# Embryonic and foetal expression patterns of the ciliopathy gene *CEP164*

Devlin LA<sup>1</sup>, Ramsbottom SA<sup>1</sup>, Overman LM<sup>2</sup>, Lisgo SN<sup>2</sup>, Clowry G<sup>3</sup>, Molinari E<sup>1</sup>, Miles CG<sup>1</sup>, Sayer JA<sup>1,4,5\*</sup>.

## Author information

### Affiliations

1. Institute of Genetic Medicine, Newcastle University, Central Parkway, Newcastle upon Tyne, NE1 3BZ, United Kingdom.
2. MRC-Wellcome Trust Human Developmental Biology Resource, Institute of Genetic Medicine, International Centre for Life, Newcastle upon Tyne, NE1 3BZ
3. Institute of Neuroscience, The Medical School, Newcastle University, Framlington Place, Newcastle upon Tyne, NE3 4HH, United Kingdom.
4. The Newcastle upon Tyne Hospitals NHS Foundation Trust, Freeman Road, Newcastle upon Tyne, NE7 7DN, United Kingdom.
5. National Institute for Health Research Newcastle Biomedical Research Centre, Newcastle upon Tyne, NE4 5PL, United Kingdom.

## Corresponding author

\*Correspondence to John A. Sayer

Institute of Genetic Medicine, Newcastle University, Central Parkway, Newcastle upon Tyne, NE1 3BZ, United Kingdom

Tel +44 191 2418608

John.sayer@ncl.ac.uk

## Abstract

Nephronophthisis-related ciliopathies (NPHP-RC) are a group of inherited genetic disorders that share a defect in the formation, maintenance or functioning of the primary cilium complex, causing progressive kidney failure and other clinical manifestations. Mutations in centrosomal protein 164 kDa (*CEP164*), also known as *NPHP15*, have been identified as a cause of NPHP-RC. Here we have utilised the MRC-Wellcome Trust Human Developmental Biology Resource (HDBR) to perform immunohistochemistry studies on human embryonic and foetal tissues to determine the expression patterns of *CEP164* during development. Notably expression is widespread, yet defined, in multiple organs including the kidney, retina and cerebellum. Murine studies demonstrated an almost identical *Cep164* expression pattern. Taken together, this data supports conserved roles for *CEP164* throughout the development of numerous organs, which we suggest accounts for the multi-system disease phenotype of *CEP164* mediated NPHP-RC.

**Keywords:** cilia, nephronophthisis, gene expression, CEP164, Joubert syndrome, development

## Introduction

Nephronophthisis-related ciliopathies (NPHP-RC) are a collection of inherited genetic disorders, grouped together by a core defect in the formation, maintenance or functioning of the primary cilium complex [1, 2]. NPHP-RC patients typically present with nephronophthisis, a fibrotic cortico-medullary cystic kidney phenotype, which frequently leads to end stage-renal disease (ESRD) [3, 4]. In some NPHP-RC cases, including Senior-Loken syndrome (SLSN), Alstrom syndrome (AS), Bardet Biedl syndrome (BBS) and Joubert syndrome (JBTS), patients have retinal dysplasia and degeneration phenotypes, such as Leber congenital amaurosis, which can deteriorate to blindness [5-7]. Neurological abnormalities are often present; JBTS patients have midbrain cerebellar vermis hypoplasia, characterised by the “molar tooth” sign on MRI analysis [5, 8]. This can cause numerous problems including ataxia, hypotonia and breathing abnormalities. Intellectual disability and developmental delay can also be present, which is demonstrated throughout the spectrum of NPHP-RC. Additionally, BBS patients are often diagnosed with hypogonadism and/or obesity [9]. Severe NPHP-RC phenotypes, including Jeune syndrome and Meckel Gruber syndrome, can also present with skeletal dysplasia, and lethal occipital encephalocele. Consistent with ciliopathy syndromes, polydactyly, liver fibrosis, facial dysmorphism, cardiac abnormalities, hearing loss and type 2 diabetes can present as secondary symptoms [9-11]. Although some disease management therapies are available, notably, there is no cure for NPHP-RC.

There are at least 25 NPHP-RC causative genes currently identified [12], accounting for a molecular genetic diagnosis in around 60% of NPHP-RC patients. Mutations in *CEP164*, also known as *NPHP15*, have been identified as a cause of NPHP-RC [1, 9]. These patients

have a largely heterogenous clinical presentation. The majority suffer with NPHP and a retinal phenotype, which in some patients cause blindness prior to two years of age. One patient was diagnosed with JBTS, and two others have BBS-like manifestations with an absence of renal problems [1, 9]. It has been proposed that homozygous truncating mutations of *CEP164*, cause a severe JBTS phenotype, whereas hypomorphic mutations may cause a less severe phenotype [1]. Patients with identical *CEP164* mutations can display different clinical manifestations, which makes it difficult to understand the pathology and progression of the disease.

*CEP164* was first identified and cloned from an adult foetal brain cDNA library [13] and is located on chromosome 11, q23.3. Its largest, most commonly cited isoform is 5,629 bp, encoding the 1,460 amino acid protein (CEP164) (NM\_014956) [1, 14]. There is an alternative isoform of CEP164 (NM\_001271933), with a 1,455 amino acid product [1, 13, 14]. CEP164 is a centrosomal protein that localises to each of the nine distal appendages of the primary cilia mature centriole, in a microtubule-independent manner [1, 2, 15-22]. This has been demonstrated by super-resolution microscopy techniques in multiple human and murine cell lines. Cell-cycle dependent recruitment of CEP164 to the basal body distal appendages is hierarchical, within a network of other distal appendage proteins. These include CEP83 (mutations in *CEP83* cause NPHP18), CEP89, SCLT1 (variants in SCLT1 may be associated with OFD IX), and FBF1. CEP164 is recruited last, defining the proximal end of the transition zone [2, 15, 18, 22-26].

Proteomics analysis has identified that CEP164 has an N-terminal tryptophan-tryptophan (WW) domain, an area of lysine-rich repeats (LR), and multiple serine/glutamine (SQ/TQ)

potential phosphorylation sites [2, 14]. There are at least 3 predicted coiled-coil domains [1, 2, 14, 15] and the C-terminal domain is currently undefined. (**S1 Figure A**). Multiple fusion protein studies have demonstrated that the CEP164 C-terminal domain is required for localisation of CEP164 to the distal appendages [1, 15]. Additionally, CEP164 has been localised to the nucleus [1, 14, 17, 27].

Numerous *CEP164* knockdown studies (siRNA/CRISPR) have demonstrated that *CEP164* loss causes aberration of ciliogenesis, with disruption of primary cilia production prior to transition zone formation; notably centriolar structure is not disrupted [15, 23, 25, 28, 29]. Upon initiation of ciliogenesis Rabin 11 imports the GTPase Rabin 8 to the basal body. CEP164 interacts with Rabin 8, facilitated by Chibby 1, to recruit Rab8 positive vesicles to the centrosome [15, 17, 19, 24, 30]. Vesicle docking is required for subsequent basal body anchoring to the plasma membrane and primary cilia development. Additionally, CEP164 forms a complex with tau tubulin kinase 2 (TTBK2) via its N-terminal WW domain. CEP164 recruits TTBK2 to the primary cilia basal body, which allows removal of the centriolar capping protein, CP110, potentially via phosphorylation, initiation of intraflagellar transport recruitment and subsequent axonemal extension [1, 15, 29, 31, 32]. The CEP164/Rabin 8 and CEP164/TTBK2 pathways work independently of each other [29]. There are other predicted interactors of CEP164 including dishevelled, NPHP3, NPHP4 and ARL13B, indicating that CEP164 is likely to have other ciliary roles [1, 15, 24, 32].

Several studies have indicated a potential role for CEP164 in ATM/ATR-mediated DNA damage response (DDR) and UV-induced nucleotide excision repair pathways, however results are conflicting [14, 17, 33]. Likewise, data supporting a role for CEP164 in cell-cycle

regulation is inconsistent [1, 2, 14, 15, 25]; both of these CEP164 roles need to be further validated.

*CEP164* has numerous orthologs, including *M.muscularis*, *D.melanogaster*, *C.reinhardtii* and *D.rerio* (S1 Figure B,C,D). The murine ortholog of *CEP164* is a 30-exon gene, located on chromosome 9, qA5.2, which shares 77% identity to the full-length human *CEP164*. It encodes a 1333 amino acid protein, which shares 58% identity to the human CEP164 1,460 amino acid protein [34, 35]. Like human *CEP164*, murine *Cep164* may have multiple isoforms.

Given *CEP164* mutations cause NPHP-RC, we sought to determine the expression of *CEP164* throughout human and murine development, particularly focusing on the cerebellar-retinal-renal phenotype. Collaboration with the Medical Research Council (MRC) Human Developmental Biology Resource (HDBR) allowed the procurement of human embryonic and foetal samples, which was compared to expression data from the murine 129/OlaHsd-*Cep164*<sup>tm1a(EUCOMM)Wtsi/+</sup> gene trap model.

# Materials and Methods

**Study approval.** The study was conducted with full ethical approval and consent. Ethical approval was obtained from the National Research Ethics Service Committee North East – Newcastle & North Tyneside 1 (08/H0906/21+5). Human embryonic and foetal tissue samples were collected with appropriate consent and ethical approval, via the Medical Research Council (MRC) Wellcome trust-funded Human Developmental Biology Resource (HDBR). Animal experiments were performed under Home Office Licences (United Kingdom) in accordance with the guidelines and regulations for the care and use of laboratory animals outlined by the Animals (Scientific Procedures) Act 1986. Protocols conducted were approved by the Animal Ethics Committee of Newcastle University and the Home Office, United Kingdom.

**Mouse Genetics.** *C57BL/6NTac-Cep164<sup>tm1a</sup>(EUCOMM)<sup>Wtsi/+</sup>* mice, which were generated for the International Phenotyping Consortium Initiative, were obtained from MRC Harwell [36]. These were backcrossed onto a *129/Ola-Hsd* background, forming mice heterozygous for the gene trap, *129/OlaHsd-Cep164<sup>tm1a</sup>(EUCOMM)<sup>Wtsi/+</sup>*. *129/OlaHsd-Cep164<sup>tm1a</sup>(EUCOMM)<sup>Wtsi/+</sup>* heterozygous (HET) mice were mated with wild type (WT) *129/OlaHsd-Cep164<sup>+/+</sup>* mice, gaining pups HET:WT 1:1. In the *Cep164<sup>tm1a</sup>* allele, upon pre-mRNA processing, exon 3 of *Cep164* splices into the *LacZ/Neomycin* cassette, within intron 3, which introduces a frame-shift and subsequent nonsense mutations (S2 Figure). This generates a *Cep164* null allele by hypothesised nonsense mediated decay. The *LacZ* cassette contains an internal ribosomal entry site (IRES), allowing translation of a beta-galactosidase fusion gene upon activation of the native *Cep164* promoter, thus acting as a *Cep164* reporter gene. Upon addition of X-Gal substrate, beta galactosidase hydrolyses X-Gal forming 5-bromo-4-chloro-3-hydroxyindole-1,

which oxidises to a blue precipitate, 5,5'-dibromo-4,4'-dichloro-indigo-2. HET *129/OlaHsd-Cep164<sup>tm1a(EUCOMM)Wtsi/+</sup>* mice were used for X-Gal *Cep164* expression studies, as they are phenotypically normal, WT mice were used as littermate controls.

***Cep164* genotyping.** Ear or tail biopsies (embryos) were lysed for 1 h, at 95°C, in 50 µl alkaline lysis buffer (25 mM NaOH, 0.2 mM EDTA, pH ≈ 12) and then neutralised in 50 µl neutralising buffer (40 mM trizma hydrochloride, pH 5-5.5). A PCR reaction using GoTaq G2 DNA Polymerase (Promega) for *Cep164<sup>tm1a(EUCOMM)Wtsi/+</sup>*, was completed using the following primers flanking the second loxp site; F1 5' CTC CCA CAG TGA CAA ATG CC 3', R1 5' GGT AGT TGT TAC TTC TGT CAG 3' (Eurofins Genomics). Expected amplicon sizes are as follows; WT (141 bp), homozygous (Hom) (163 bp), HET (141 bp and 163 bp). PCR products were run on a 1.5% agarose gel, with GelRed Nucleic Acid GelStain (1:10,000) (Biotium) at 150V for 45 min. To confirm correct genotyping, representative samples were Sanger-sequenced (GATC-BIOTECH).

**Murine Tissue Collection, Fixation, Sectioning and Staining.** Murine tissue (kidney, brain, eye, heart, lung, liver, testes) was collected at P0.5/P1.5, P15.5 and P29.5/P30.5, using a standard dissection procedure. Tissues were fixed in 0.2% glutaraldehyde fix (0.2% glutaraldehyde, 2mM MgCl<sub>2</sub>, 5mM EGTA in PBS) for 90 min at 4°C, washed in PBS and then stored in 15% sucrose/PBS overnight at 4°C. Tissues were transferred to 30% sucrose/PBS and incubated at 4°C overnight or until samples sunk. Tissues were frozen in OCT compound, and stored at -80°C.



Sections of tissues were cut (10-12µm) using a cryostat and mounted on charged glass slides. These were incubated in 0.2% glutaraldehyde fix (0.2% glutaraldehyde, 2mM MgCl<sub>2</sub>, 5mM EGTA in PBS) for 5 min, washed in PBS for 10 min, and then washed in X-Gal wash (2 mM MgCl<sub>2</sub>, 0.01% Sodium Deoxycholate, 0.02% NP-40 in PBS) for 10 min. Slides were incubated with X-Gal stain (1mg/ml of X-Gal DMSO in 2 mM MgCl<sub>2</sub>, 0.01% Sodium Deoxycholate, 0.02% NP-40, 5mM Potassium Ferricyanide, 5mM Potassium Ferrocyanide in PBS) at 37°C in the dark, until the blue precipitate stain intensity did not further increase or WT littermate controls showed endogenous beta galactosidase staining. Slides were washed in PBS and then dehydrated to 100% ethanol before clearing in Histoclear II (National Diagnostics) and mounting in DPX mounting medium (Sigma-Aldrich), slides were imaged using the SCN400 Side Scanner (Leica).

**Murine Embryo Collection, Wholemount Fixation and Staining.** Murine embryos were collected at E9.5, E10.5 and E12.5 using a standard dissection procedure. Embryos were fixed in 0.2% glutaraldehyde solution (0.2% glutaraldehyde, 2mM MgCl<sub>2</sub>, 5mM EGTA in PBS) for 1 hour on ice and washed with X-Gal wash (2 mM MgCl<sub>2</sub>, 0.01% Sodium Deoxycholate, 0.02% NP-40 in PBS) prior to overnight storage at 4°C. Embryos were incubated in X-Gal stain, consisting of 25mg/ml of X-Gal/DMSO solution in a 1 in 25 dilution of X-Gal staining buffer (2 mM MgCl<sub>2</sub>, 0.01% Sodium Deoxycholate, 0.02% NP-40, 5mM Potassium Ferricyanide, 5mM Potassium Ferrocyanide in PBS) at 37°C in the dark; incubation was completed once the blue precipitate stain intensity did not further increase or WT littermate controls started to show endogenous beta galactosidase staining. Embryos were washed in 1x phosphate buffered saline solution (PBS) (Gibco, pH7.45) and dehydrated in 70% ethanol, prior to imaging using a Leica Man Stereomicroscope and Axiovision software.

215

216 **Human Tissue collection, fixation and processing.** Human embryonic and foetal tissues  
 217 were obtained from the MRC Wellcome Trust-funded Human Developmental Biology  
 218 Resource. CS23 whole embryos were fixed in 4% paraformaldehyde (PFA), for 72 hours,  
 219 with incision in the skull down the sagittal plane and a slit in the abdomen at the umbilicus.  
 220 Tissues were transferred to methacarn until further processed. This same protocol was used  
 221 for processing of foetal eye, brain and kidney; the embryonic and foetal kidney were cut  
 222 sagittally, to allow the fix to penetrate. Human embryonic and foetal tissues were washed in  
 223 increasing concentrations of ethanol, and then incubated in 3 changes of xylene before  
 224 embedding in paraffin wax. Sections, on positively charged glassed slides, were de-waxed in  
 225 two washes of xylene, and then rinsed in two changes of absolute ethanol. Slides were  
 226 incubated in methanol peroxide solution (0.5% H<sub>2</sub>O<sub>2</sub>) for 10 min to block endogenous  
 227 peroxidase. Slides were rinsed in tap water and then antigen retrieval was completed using  
 228 citrate buffer. After rinsing in Tris-buffered saline (TBS), slides were incubated with 10%  
 229 goat serum (Vector) for 10 min at room temperature and then incubated with the primary  
 230 antibody in goat serum with TBS overnight at 4 °C (**S1 Table**). After washing with TBS,  
 231 slides were incubated with the goat anti rabbit BA-1000 biotinylated secondary antibody  
 232 (Vector Laboratories) diluted in goat serum with TBS (1/500), for 30 min at room  
 233 temperature. The secondary was washed with TBS and then slides were incubated with  
 234 VECTASTAIN Elite ABC kit PK6100 tertiary complex (Vector Laboratories), for 30 min at  
 235 room temperature. After TBS washes, the stain was developed for 10 min at room  
 236 temperature using ImmPACT DAB peroxidase substrate (SK-6100) solution (Vector  
 237 Laboratories). The slides were washed thoroughly in water, and counterstained with  
 238 haematoxylin, dehydrated, cleared and mounted.

239

An indirect, two-step, method was utilised for the foetal kidney sections. Samples were incubated with a HRP goat anti-rabbit IgG peroxidase secondary (Vector) (1/500). After TBS washes, the stain was developed using DAB peroxidase substrate solution, as described previously. No primary controls sections were utilised as negative controls, anti-PAX6 was utilised as a positive control for the brain and cerebellum (**S1 Table**).

**Image analysis.** Images of human and murine tissues were analysed using the SCN400 Slide scanner software (Leica). Figures 1-4, and S3-S5 Figures were generated using Adobe Photoshop CS3 Extended.

**Data Availability.** The authors declare that all data supporting the results are presented with the article, supporting data can be gained from the corresponding author upon reasonable request.

## Results

### CEP164 expression during human and murine renal development

In the human embryonic and foetal kidney, immunohistochemical staining demonstrates that CEP164 is present in the metanephric epithelial-derived renal vesicles, comma-shaped bodies and subsequent s-shaped bodies, during all time points analysed (8PCW-18PCW) (**Figure. 1 A.I.II.III.VII B.I.II C.I.II**). This expression pattern is maintained throughout nephrogenesis, with CEP164 present in the primitive nephron tubule (8PCW), but also in more defined proximal and distal nephron segments, as well as cells of the loop of Henle, as seen from 14 PCW (**Figure 1A.I.IV.VII, B.I.IV.VII, C.I.IV.VII**). Specifically, CEP164 expression is

defined to the apical membrane of the epithelial cells lining the developing nephron lumen, during all the developmental time points analysed (8PCW- 18PCW). Notably, CEP164 expression is stronger in the premature nephron renal vesicles, comma-shaped bodies, s-shaped bodies and immature renal tubules, which is then reduced in the more developed cortical and medullary tubular segments (8PCW-18PCW). CEP164 does not seem to be expressed, or is expressed very weakly, in the metanephric cap mesenchyme (**Figure 1A.III, B.III**).

**Figure 1. Expression of CEP164 throughout human and murine renal development**  
(A-C) Human renal development, (A) 8 PCW, (B) 14 PCW and (C) 18 PCW respectively. (D, E) Murine postnatal renal development, (D) P1.5 and (E) P30.5. In human kidney, CEP164 expression is seen in the apical membrane of the metanephric renal vesicles (A.II, B.II), s-shaped bodies (B.II, C.I, C.II) and developing renal tubules (A.IV, B.IV). From 14 PCW CEP164 expression is seen at the apical membrane of all developing tubular segments including the distal and proximal tubules, (B.IV, C.IV) and loop of Henle segments (B.VII, C.VII). CEP164 expression is seen in the cells of the uterine bud (A.III, B.III, C.II) at both the apical and basal membrane (A.VII, B.VII, C.VII). CEP164 expression is seen in the glomerulus of the developing renal corpuscle (A.V, B.V, C.V), and weakly in the matured renal corpuscle (A.VI, B.VI, C.VI). In murine kidney *Cep164* expression is seen in the developing renal vesicles (D.II) and ubiquitously throughout subsequent nephron renal tubules (D.IV, E.III, F.IV). *Cep164* expression is seen in the glomerulus of the developing renal corpuscle (D.V), but expression is lost with maturity (D.VI, F.IV). All scale bars represent 100µm.

Cap mesenchyme (CM), collecting duct (CD), distal tubule (DT), loop of henle (LH),  
postnatal day (P), post conception weeks (PCW), proximal tubule (PT), renal corpuscle (RC),  
renal tubule (RT), renal vesicle (RV), s-shaped body (SSB), uteric bud (UB).

In the developing human kidney, CEP164 is expressed in the glomerulus of the renal  
corpuscle at 8 PCW-18 PCW, indicating podocyte CEP164 expression (**Figure 1A.V.VI, B.V.VI, C.V.VI**). The data suggests that CEP164 expression is reduced as the glomeruli  
matures; this is most clearly seen at 18 PCW.

The human embryonic/foetal renal uteric bud, which forms the collecting duct, is derived  
from the metanephrogenic diverticulum. Both the uteric bud and collecting duct also show  
CEP164 expression in the apical membrane of the epithelial cells lining the tubular lumen  
(8PCW-18PCW) (**Figure 1A.III.VII, B.III.VII, C.III.VII**). CEP164 is also expressed at the  
basolateral membrane of the collecting duct tubule (8PCW-18PCW). CEP164 expression is  
not present in the human renal interstitium (**Figure 1A-C**). Negative control staining  
indicating that CEP164 expression in the human kidney was specific (**S4 Figure A,B**).

In the murine kidney (*129/OlaHsd-Cep164<sup>tm1a(EUCOMM)Wtsi/+</sup>*), the *LacZ* reporter assay  
demonstrates that *Cep164* expression correlates with human kidney CEP164 expression.  
Correspondingly, *Cep164* is expressed in the developing murine renal vesicles, s-shaped  
bodies (P1.5) (**Figure 1D.I.II**) and the subsequent renal tubules, including nephron segments

in both the cortex and medulla (P29.5) (**Figure 1D.IV, E.I.III.IV**). The staining indicates that there is potentially cell-specific expression within each of the tubular segments. *Cep164* is also expressed in the glomeruli of the renal corpuscle at P1.5, which is not present in mature glomeruli at P29.5 (**Figure 1D.V.VI, E.II**). Likewise, *Cep164* is expressed in the developing mesonephric uterine bud and collecting ducts (**Figure 1D.II**). Controls demonstrate that there is no endogenous *LacZ* expression in the kidney (**S5 Figure B**).

### **CEP164 expression during human and murine retinal development**

In the developing human retina, CEP164 expression is widespread yet defined (**Figure 2A**). In early retinal development (11 PCW) CEP164 is expressed weakly in the developing nerve fibre layer (NFL) (fibrous extensions from the optic nerve) and nerve fibres in the differentiating ganglion cell layer (GCL)/inner plexiform layer (IPL) (**Figure 2A.I**). The basally located layer of cone precursors, which has differentiated from the outer neuroblastic cell layer (ONBL), also demonstrates strong CEP164 expression (**Figure 2A.I**). By 14 PCW, CEP164 expression is defined to the NFL, the IPL and the photoreceptor layer which now has both developing rods and cones (**Figure 2A.II**). Later in development, 19 PCW, once all of the primitive retinal layers have formed, CEP164 expression is maintained in the nerve fibres of the NFL, the ganglionic and inner nuclear nerve fibril synapses of the IPL, and the inner segments (IS) and outer segments (OS) of the photoreceptor cell layer (**Figure 2A.III**). At 19 PCW, CEP164 expression is also present in the developing outer plexiform layer (OPL) which contains nerve fibril synapses between the inner nuclear layer (INL) and the outer nuclear layer (ONL). CEP164 expression in the retinal pigment epithelial layer (RPE) cannot be defined due to its natural dark colouring.

## Figure 2. CEP164 expression in the developing human and murine retina

(A) Human Retina, (A.I) 11 PCW, (A.II) 14 PCW, and (A.III) 19 PCW. (B) Murine Retina, (B.I) P1.5, (B.II) P15.5, (B.III) P29.5. In the developing human retina, weak CEP164 expression is seen in the nerve fibre layer (NFL) and ganglion cell layer/inner plexiform layer (GCL/IPL) (A.I) and strong expression in outer neuroblastic (ONBL) photoreceptor precursors (black arrow) (A.I). By 11 PCW, CEP164 expression is seen in the developed inner plexiform layer (IPL) and the developing photoreceptor layers (A.II). At 19 PCW, CEP164 expression is seen in the nerve fibre layer (NFL), inner plexiform layer (IPL), outer plexiform layer (OPL) and photoreceptor layer, with enhancement in the inner photoreceptor segments (IS) (A.III). In the developing murine retina (B), *Cep164* expression is seen in the inner plexiform layer (IPL), ganglion cell layer (GCL) and outer neuroblastic (ONBL) photoreceptor precursors (see arrow) (B.I). At P15.5, *Cep164* expression is seen in the ganglion cell layer (GCL), the outer plexiform layer (OPL) and inner segment (IS) of the photoreceptor layer (B.II). There is also punctate expression in the inner plexiform layer (IPL) and edges of the nuclear cell layers (B.II). Retinal pigment epithelium (RPE) also shows *Cep164* expression (B.I, B.II). This murine retinal expression patterning is maintained after retinal development (B.III).

Ganglion cell layer (GCL), inner nuclear layer (INL), inner plexiform layer (IPL), inner segment (IS), nerve fibre layer (NFL), outer neuroblastic cell layer (ONBL), outer nuclear layer (ONL), outer plexiform layer (OPL), outer segment (OS), photoreceptor segment layer (PS), retinal pigment epithelium (RPE).

Murine *Cep164* retinal expression in (*129/OlaHsd-Cep164<sup>tm1a(EUCOMM)Wtsi/+</sup>*) largely corresponds to the human CEP164 expression patterns, with expression maintained in the developing IPL, OPL and PS layer (P1.5-P29.5) (**Figure 2B**). However, there are some clear differences. *Cep164* is expressed in retinal precursor cells throughout the murine ONBL, which in the developing human retina is restricted to the cone precursor cells. Additionally, strong *Cep164* expression is present and maintained throughout the GCL (P1.5-P29.5) (**Figure 2B**). *Cep164* is also expressed sparsely in some cells of the INL and ONL, however these tend to be at the boundaries of the plexiform layers (P15.5-P29.5) (**Figure 2B.II.III**). Notably, at later stages of development, *Cep164* expression is clearly defined to the IS of the photoreceptor cell layer (P15.5-P29.5) (**Figure 2B.II.III**). Additionally, the retinal pigment epithelial layer demonstrates strong, cell-specific *Cep164* expression throughout development (P1.5-P29.5) (**Figure 2B**). WT controls demonstrate no endogenous X-Gal staining (**S5 Figure A**).

## CEP164 expression during human and murine neuronal and cerebellar development

CEP164 is expressed widely throughout human brain development (8PCW-18PCW) (**Figure 3A-D**). At 8PCW CEP164 is strongly expressed in the neuroepithelium of the developing telencephalon (Tel), which is defined in cells lining the lateral ventricle (LV), including the ventricular layer (VL), subventricular layer (SVL), cortical plate (CorP) and marginal layer (MaL), (**Figure 3A.I.VI, B.I.VI**). At 8 PCW, CEP164 is also present in the developing neuroepithelium of the diencephalon (Di), mesencephalon (Mes), metencephalon (Met) and myelencephalon (Mye), with expression strongest in the apical epithelium lining the brain ventricles (**Figure 3A.I.V.VI.VII, 3B.I.VI.VII.VIII**). At 8PCW there is strong, well-defined CEP164 expression in the midline of the myelencephalon (**Figure 3B.IV.V**), as well as cells of



the nasal epithelium (**Figure 3B.IX**). Throughout human brain development (8PCW-18PCW) the choroid plexus demonstrates strong CEP164 expression, specifically in the ependymal cells, and more weakly in the choroid plexus pia matter (**Figure 3A.II.III.IV, B.II.III, C.V, D.V**). The developing human cerebellar folds show defined CEP164 expression in the migrating molecular cell layer at 16 PCW, but this is reduced by 18PCW (**Figure 3C.I.II, D.I.II**). CEP164 is expressed at the apical membrane of the ventricular surface of the pons and cerebellum, as well as the myelencephalon, specifically in the axon tracts of the medulla oblongata (**Figure 3A.VII.VIII, C.III.IV.VI, D.III.IV.VI**). This expression pattern can be seen from 8PCW to 18 PCW, however CEP164 expression levels are much weaker by 18 PCW. At 8PCW CEP164 is expressed in the white matter, but this is lost with maturation of the cerebellum (**Figure 3A.VII, C.VII, D.VII**). Notably the human foetal brain negative controls demonstrate no positive staining (**S4 Figure D-F**). A PAX6 antibody was used as a positive control (**S4 Figure E,F**).

### **Figure 3. CEP164 expression in the developing human and murine hindbrain**

Developing human hindbrain (A-D), 8 PCW (A-B), 16 PCW (C) and 18 PCW (D). At 8 PCW in the developing human brain CEP164 expression is seen in the neuroepithelium surrounding the telencephalon, diencephalon, mesencephalon, metencephalon and myelencephalon, with defined expression in apical neuroepithelial cells lining the brain ventricles (A.I.V.VI.VII.VIII, B.I.VI.VII.VIII) demonstrated by black arrows. Defined expression is present in the layers of the telencephalon (A.VI, B.VI). The choroid plexus shows strong CEP164 expression in the ependymal cells (A.II.III.IV, B.II.III), with weaker expression in the choroid plexus pia matter (A.IV, B.II.III). There is defined expression of CEP164 to the human brain midline (B.IV.V) and the nasal epithelium (B.IX). Choroid plexus ependymal cell expression pattern of CEP164 is maintained (C.I.V, D.I.V). CEP164

expression is seen in the migrating molecular cell layer of the developing cerebellum (C.II), which is lost with molecular cell layer maturation (D.II). In the human hindbrain the apical membrane of the pons and the cerebellum demonstrate defined CEP164 expression is seen (C.III,IV), which is lost with maturation (D.II.IV). Weak CEP164 expression is seen in the human medulla oblongata (C.VI, D.VI) but not in the white matter (C.VII, D.VII).

Developing murine hindbrain (E-H), P0.5 (E-F), P15.5 (G) and P30.5 (H). *Cep164* expression is seen in the developing P0.5 murine brain (E, G.I, H.I) with expression in the cortex, striatum and cerebrum of the maturing cerebral cortex (G.V, H.V), thalamus (G.VI) and midbrain (G.VII, H.VI) at P15.5 and P30.5. *Cep164* expression is strong and defined in the ventricular neuroepithelium (G.VII.VIII). The murine choroid plexus demonstrates strong *Cep164* expression, however it is not defined to a specific cell type. (E.III, F.IV). In the murine model, *Cep164* is expressed in the migrating molecular layer (F.I.II), however this expression is maintained throughout development with expression also in the molecular layer, ganglion cell layer and Purkinje cell layer (G.III,H.III). *Cep164* expression is seen in the murine cerebellum (F.III,G.III), in the murine pons (F.V, H.VI), and weakly in the cerebellar white matter (F.VI), which is lost with maturation (H.IV).

Aqueduct (Aq), axon tract (AT), cerebellum (Ce), cerebral cortex (CC), cerebral hemisphere (CH), cerebrum (Cr), choroid plexus (CP), cortex (Cor), cortical plate (CorP), diencephalon (Di), ependymal cells (Ep), fourth ventricle (FV), ganglion cell layer (GCL), inner plexiform layer (IPL), intermediate zone (IL), lateral ventricle (LV), marginal layer (MaL), medulla oblongata (MO), mesencephalon (Mes), metencephalon (Met), midbrain (MB), midline (Mi), molecular cell layer (MCL), myelencephalon (Mye), nasal epithelium (Na), outer neuroblastic layer (ONBL), pia (P), pons (PO), purkinje cell layer (PCL), retinal pigment epithelium

(RPE), striatum (St), sub-ventricular layer (SVL), telencephalon (Tel), thalamus (Th), third ventricle (TV), ventricular layer (VL), ventricular surface (VS), white matter (WM).

Corresponding with the developing human brain, *Cep164* is expressed in the neuroepithelium of the murine telencephalon (*129/OlaHsd-Cep164<sup>tm1a(EUCOMM)Wtsi/+</sup>*) (cerebral hemisphere), diencephalon, mesencephalon (midbrain), metencephalon (pons) and myelencephalon (medulla oblongata) at P0.5 (**Figure 3E.I.VI.VII.VIII, F.V**). At later stages of development (P15.5-P30.5), clear *Cep164* expression can be seen throughout the brain including the cerebrum and striatum of the cerebral cortex, the thalamus of the diencephalon, the midbrain and hindbrain pons and medulla oblongata (**Figure 3G.I.V.VI.VII.VIII, H.I.V.VI.VII**). Additionally, correlating with human foetal expression, *Cep164* is expressed strongly in neuroepithelium lining the brain ventricles, including the third ventricle, fourth ventricle and cerebral aqueduct (**Figure 3G.VI.VII**).

At P0.5 to P15.5 *Cep164* is expressed in the migrating molecular cell layer and Purkinje layer of the cerebellum (**Figure 3F.I.II, G.I.II.III**). Later in development, *Cep164* is also expressed in the ganglion cell layer (P30.5) (**Figure 3H.I.II.III**), potentially this might be seen later on in human foetal development. *Cep164* is also expressed at the apical membrane of the ventricular surface of the cerebellum at P0.5 and P15.5 (**Figure 3F.III, G.III**). Unlike the human cerebellar expression, *Cep164* is expressed in the white matter of the cerebellum which is present, although reduced at P30.5 (**Figure 3E.IV, F.VI, G.IV, H.IV**). *Cep164* is also expressed in the choroid plexus, ependymal cells, which is demonstrated in P0.5 sections (**Figure 3E.I.II.III, F.IV**). Murine controls demonstrate that there is no endogenous *LacZ* expression in the murine brain (**S5 Figure F-H**).

## CEP164 expression during human and murine development in other tissues

CEP164 is expressed widely throughout the developing human embryo at 8PCW (**Figure 4A.I**). In the 8PCW lung, CEP164 is expressed most strongly in the epithelial cells lining the lumen of the bronchi and bronchioles (**Figure 4A.II.III**). Weaker CEP164 expression is also present in the bronchiole smooth muscle, and the alveoli primordia (**Figure 4A.II.III**). In the 8PCW developing heart, CEP164 is expressed in cardiomyocytes (**Figure 4A.IV.V**). The gastrointestinal tract also shows strong defined CEP164 expression in the inner mucosa squamous epithelium cell layer, muscularis mucosae cell layer and the external muscularis externa layer at 8PCW (**Figure 4A.VI**). At 8PCW in the developing gonads, CEP164 is expressed weakly in the germline epithelium, but strongly in the seminiferous cord tubules (**Figure 4A.VII.VIII**). Additionally, CEP164 is expressed strongly in the dorsal root ganglia of the spinal cord, with weak expression in the developing vertebrae (**Figure 4A.X**). CEP164 is also expressed in developing bone primordia of the limbs at 8 PCW (**Figure 4A.X**).

## Figure 4. CEP164 expression in secondary organs throughout human and murine development

(A) Human 8 PCW. (B) Murine; P0.5 (B.I-III), P15.5 (B.IV-XVII), P30.5 (C.I-IXV). In the developing human, lung CEP164 expression is seen in the respiratory epithelial lining of the bronchi and bronchioles, with weaker expression in the smooth muscle and alveoli (AII.III). In the developing murine lung, Cep164 expression is in respiratory epithelial lining of the bronchi and bronchioles, with additional *Cep164* expression seen in the respiratory epithelial cells lining the trachea and the tertiary bronchioles (B.IV.V.VI.VII.VIII.IX, C.I.IV.V.VI). *Cep164* expression is seen in murine alveoli (B.IX), which is lost with maturity (B.VII).

*Cep164* expression is seen within the cartilage of the trachea (B.V.VI, C.II.III). In the human heart, CEP164 expression is seen in the developing cardiomyocytes (A.IV.V). In the murine heart *Cep164* expression is seen in the developing cardiomyocytes (B.X.XI, C.VIII.IX). In the human gastrointestinal tract CEP164 expression is seen in the inner mucosae squamous epithelial cell layer, muscularis mucosae cell layer and the external muscularis cell layer (A.VII). In the developing human gonads, CEP164 expression is seen in the germline epithelium and seminiferous cord (A.VII.VIII). In the developing murine testes, P15.5, *Cep164* expression is seen in the seminiferous tubules, specifically the smooth muscle cells spermatogonia, spermatocytes and most strongly in spermatids (B.XI.XII.XIII); expression in leydig cells and connective tissue can also be seen (B.IXX). At P30.5, *Cep164* expression is defined to the spermatogonia, spermatocytes and spermatids (C.X.XI.XII).

CEP164 expression is seen in the dorsal root ganglia of the human spinal cord, (A.IX) with weaker expression also present in the vertebrae primordia (A.IX) and bone primordia (A.X).

*Cep164* expression is seen in the murine developing costal cartilage, with weaker expression in intercostal muscle (B.II.III). The human foetal liver demonstrates some evidence of CEP164 expression (A.XI). The developing murine liver demonstrates *Cep164* expression in epithelial cells lining the hepatic portal veins (B.XV.XVI.XVII, C.XIII.XIV), but no expression is seen in hepatocytes.

Aveoli (Av), alveoli primordia (Av Pri), bile duct (BD), bone primordia (BP), bronchiole (Br), cardiomyocyte (CM), cartilage (Ca), connective tissue (CT), costal cartilage (CC), dorsal root ganglia (DRG), epithelial (Ep), gastrointestinal tract (GI), germline epithelium (GE), gonad (Go), heart (Ht), hepatocytes (Hep), intercostal muscle (IC), kidney (Ki), lamina propria (LM), liver (Li), lung (Lu), muscularis externa (ME), muscularis mucosae (MM), respiratory bronchiole (R), seminiferous cord (SeC), seminiferous tubule (ST), smooth

muscle (SM), spermatids (Sp), spermatocytes (SC), spermatogonia (Spg), squamous cell  
mucosae (Mc-sq), submucosae (SB), trachea (Tr), terminal bronchi (TB), vertebrae (Vt).

Murine postnatal tissues also demonstrate widespread *Cep164* expression. At P0.5 *Cep164* is expressed in the developing costal cartilage primordia and intercostal muscles (**Figure 4B.I.II.III**). Correlating with the human lung, in the developing murine P15.5 and P30.5 lung, *Cep164* is present in the epithelial cells lining the trachea, bronchioles and terminal/respiratory bronchioles, as well as the smooth muscle and cartilage of the trachea and bronchi. (**Figure 4B.IV.V.VII.VIII, C.I.II.III.IV.V.VI**). Weak *Cep164* expression is seen in the alveoli at P15.5, which is reduced by P29.5 (**Figure 4B.IX, C.VII**). Like human embryonic tissues, *Cep164* is present in cardiomyocytes at P15.5 and P30.5 (**Figure 4B.X.XI, C.VIII.IX**). In postnatal P15.5 murine testes, *Cep164* is expressed in the connecting tubules and Leydig cells (**Figure 4B.XII.XIII.XIV**). In the seminiferous tubules, *Cep164* is expressed in the smooth muscle cells and weakly in developing spermatogonia and spermatocytes. Strong *Cep164* expression is present in the spermatid tails. By P30.5 *Cep164* expression is defined to developing spermatogonia, spermatocytes, and spermatids (**Figure 4C.X.XI.XII**). At P15.5 and P30.5 *Cep164* is expressed strongly in cells lining the ciliated cholangiocyte cells of the bile duct, however hepatocytes do not show any expression (**Figure 4C.XV.XVI.XVII, D.XIII.XIV**). Wholemount *Cep164* expression studies (E9.5, E10.5, E12.5), demonstrate that *Cep164* expression is widespread throughout murine embryonic development, including the bronchial arches and organ primordia, as well as the developing CNS, heart and limbs (**S3 Figure**). Taken together this indicates that CEP164

expression is widespread throughout human and murine development in tissues beyond the cerebello-retinal-renal structures associated with typical disease phenotypes.

## Discussion

In this study we have described the expression of CEP164 in the developing human embryo and foetus, utilising immunohistochemistry, focusing upon the kidney, retina and cerebellum. Conservation of CEP164 expression was explored using a *LacZ* gene trap assay to characterise *Cep164* expression in corresponding murine tissues (*129/OlaHsd-Cep164<sup>tm1a(EUCOMM)Wtsi/+</sup>*). Notably, during murine development, the kidney, retina and cerebellum continue to develop postnatally. This reflects the chosen murine postnatal timepoints in this study, corresponding to estimated human embryonic and fetal developmental timepoints (S2 Table, S3 Table, S4 Table).

Our results demonstrate that during human and murine development CEP164 is expressed widely, in multiple organs. Notably, CEP164 expression is clearly defined within tissues. In the developing human kidney, CEP164 is expressed in the apical epithelium membrane of metanephric-derived renal vesicles and subsequent nephron tubules (8PCW-18PCW), correlating with the presence of primary cilia [37]. Primary cilia are vital in the kidney for mechanosensation and chemical signal transduction, which is required for orientated cellular divisions during development and kidney maintenance. As CEP164 expression seems to be low/not present in the cap mesenchyme, it could be speculated that CEP164 expression is switched on during mesenchymal-epithelial transition, which coincides with the formation of the primary cilium during establishment of apical-basal polarity, cell junctions and lumen formation [37]. CEP164 is expressed within the glomerulus of the renal corpuscle, with a

reduction in expression with maturity. Interestingly, this correlates with the loss of primary cilium in podocytes seen with glomeruli maturity in rats [38]. It could be postulated that in the developing human kidney, primary cilium, and thus CEP164 expression, is lost in maturing glomeruli [38]. This could protect against overstimulation of calcium-mediated signalling due to an increase in glomerular filtration rate [38]. CEP164 is also expressed in the uterine bud, which develops into the primary ciliated collecting duct network (8PCW-18PCW), consistent with numerous IMCD3 expression studies [1, 19, 20, 25, 32]. The human CEP164 expression pattern is conserved in the murine kidney (P0.5-P29.5); there may be cell-specific *Cep164* expression within nephron tubular segments, however this would need to be further studied.

Although our data is focused upon development, the human protein atlas indicates that the CEP164 expression is maintained in the adult kidney [39]. A combination of P30.5 expression data and previous wholemount *Cep164* expression studies also indicate that *Cep164* expression is maintained in the adult mouse kidney [36]. Together this suggests that CEP164 may have roles in both normal renal development and maintenance of kidney function in the human and mouse. Aberrant CEP164 function in the kidney could contribute to abnormal primary cilium functioning, causing dysfunctions in cell divisions and cell signalling, leading to cystogenesis. This is consistent with the NPHP-RC phenotype present in most patients with *CEP164* mutations [1].

In the human retina, CEP164 is expressed in the NFL, OPL, IPL and photoreceptor layer between 8PCW-18PCW. CEP164 expression in the GCL is lost prior to 14 PCW, whereas it is maintained in the murine retina (P0.5-P29.5). The murine retina also shows *Cep164*



expression in the ONBL primordial layer, with punctuate expression at the edges of the INL and ONL. Multiple studies have suggested that primary cilia are present and functional in neurones [40]. It could be speculated they are also present in the neurones seen in the NFL, OPL, IPL, GCL, ONBL, IBL and OBL, which would link with CEP164 expression. The human and murine retina have shown some differences in gene and protein expression in previous studies, potentially this is the case with CEP164 in the retina [41].

Retinal photoreceptor cells have a specialised connecting primary cilium between the inner and outer segment of the photoreceptors. It therefore seems reasonable that CEP164, a distal appendage centrosomal protein, is expressed in photoreceptor segment in the developing human and murine retina. CEP164 expression has been previously identified in the murine connecting cilium, further confirming our results [1, 42].

In the murine retina, *Cep164* expression is defined to the inner segment of the photoreceptor layer by P15.5. This correlates with previous preliminary *Cep164 In Situ hybridisation* studies [43]. It can be hypothesised that the *Cep164* is transcribed and translated in the inner segment but then the CEP164 protein is transported to the outer segment of the photoreceptor cells; this would not be detected by the X-Gal assay but could be defined in the human assay. Interestingly, the murine *Cep164* expression pattern is maintained in the adult mouse. It is likely that human CEP164 expression is also maintained in the human adult retina, potentially with a role in retinal development and tissue functioning.

It is also well established that CEP164 is present at the basal body of retinal pigment epithelial cells, clarifying the results from our study [1, 2, 15, 17, 23]. It can be hypothesised that with abnormal functioning/loss of CEP164, there could be atypical outer segment

formation, which could lead to the accumulation of phototransduction proteins that could trigger cell loss, leading to a retinal degeneration phenotype, as seen in some *CEP164* NPHP-RC patients [1, 9, 44].

*CEP164* is expressed throughout the developing human brain (8PCW-18PCW) and the developing murine brain (P0.5-P29.5), including the telencephalon, diencephalon, mesencephalon, metencephalon and myelencephalon. In early human development (8 PCW) *CEP164* is expressed widely throughout the cerebellum, including the white matter. By 16 PCW this expression is focused to the migrating molecular cell layer, however *CEP164* expression is still strong in the axon tracts of the medulla oblongata and the apical neuroepithelium membrane surrounding the pons and cerebellum. At 18 PCW *CEP164* staining in the molecular layer is considerably weaker. Human protein atlas studies indicate that *CEP164* is present at low levels within the cerebral cortex, hippocampus and caudate, but is not expressed within the adult cerebellum, however these studies have not been validated [39].

Primary cilia are vital in the developing brain for Shh signalling, which is needed for proliferation of neuronal granular cell precursors in vertebrates, being a major driver of cerebellar precursors [45, 46]. Shh is also required for the cell-specific expansion of postnatal progenitors [40]. Wnt signalling, transduced by the primary cilia, is also required for neuronal patterning, cell proliferation and neuronal migration [46-48]. In the adult nervous system, primary cilia are thought to be required in stem cell regulation and tissue regeneration, however the full extent of primary cilia function in the adult central nervous system is still to be determined [40, 45]. It could be suggested that *CEP164* has a functional role in human

brain development. Potentially, aberrant function of CEP164, may lead to brain dysplasia via abnormal primary cilia functioning in neuronal precursors. Some CEP164 NPHP-RC patients show neurological phenotypes, including abnormal developmental delay, intellectual disability and in one patient, cerebellar vermis aplasia, an archetypal feature of Joubert syndrome. Another patient also experiences seizures [1, 9].

In the murine cerebellum, *Cep164* expression is widespread including the migrating molecular, ganglion and Purkinje cell layers, as well as the white matter (P0.5-P29.5). Wholemount expression studies from the international phenotyping consortium have shown that *Cep164* is expressed strongly throughout the adult murine brain [36]. It may be that *Cep164* RNA expression does not directly correlate with CEP164 protein expression. Although there is believed to be high conservation between the human and murine transcriptomic networks, CEP164 may be part of the divergent pathway in the human-murine brain transcriptomics [46].

Leptin receptors are situated in the primary cilia on the choroid plexus, and in the hypothalamus [47]. Leptin signalling is vital in the hypothalamic satiety pathway. Patients with mutations in centrosomal BBS proteins demonstrate hyperleptinemia due to leptin resistance, which causes hyperphagia and subsequent weight gain. It could be hypothesised that CEP164, which is expressed in the developing choroid plexus of the human (8 PCW, 16 PCW, 18PCW) and murine brain (P0.5), may not only play a role in gross neurological development, but may also be involved indirectly in leptin receptor localisation or functioning within the primary cilium. This could contribute to the obesity phenotype seen in some CEP164 NPHP-RC patients [1, 9].

649

650 Ependymal cells of the choroid plexus, which contain motile cilia, are required for the  
651 production and regulation of cerebral spinal fluid (CSF). Additionally, the lateral ventricle  
652 epithelium contains motile cilia which is important for the movement of CSF throughout the  
653 brain ventricles. Previous studies have established a ciliogenesis role for CEP164 in the  
654 motile cilium and demonstrated CSF defects including hydrocephalus in zebrafish and  
655 murine models lacking a functioning CEP164 [24]. This further validates the strong CEP164  
656 expression in ependymal cells and the neuroepithelium lining the brain ventricles.

657

658 CEP164 is also expressed in tissues secondary to the cerebellar-retinal-renal phenotype, some  
659 of which have motile cilium. Taking together results from a previous murine CEP164 motile  
660 cilia study [24], it is plausible that CEP164 is expressed in the ciliated epithelial cells of the  
661 trachea, bronchi and bronchioles in the human (8 PCW) and murine (P15.5-P29.5) lung.  
662 Previous studies indicate that this is likely to be maintained in the adult human and murine  
663 lung [36, 39]. *Cep164* is also expressed in the murine spermatids, which have a flagellum,  
664 effectively a modified motile cilium [48]. Studies have demonstrated that CEP164 is  
665 expressed in the capitulum and striated columns of the human sperm neck [49]. Using  
666 information from a recent FOXJ1 mediated knockout of *Cep164*, it could be hypothesised  
667 that CEP164 is required for the formation, maintenance and functioning of motile cilia within  
668 the respiratory epithelium, reproductive tissues and the sperm flagella [24]. Mutations and  
669 subsequent aberrant functioning or loss of CEP164 may contribute to lung phenotypes such  
670 as pulmonary bronchiectasis, as seen in some patients with *CEP164* mutations [1]. This may  
671 also contribute to aberrant spermatid function, which may cause infertility problems as seen  
672 typically in BBS models [9].

673

674 CEP164 is also expressed in other developing tissues that contain a primary cilium, (human 8  
675 PCW, mouse P15.5-30.5); including cardiomyocytes of the heart, cholangiocytes of the liver  
676 bile ducts, smooth muscle cells, cartilage, spermatogonia and spermatocytes, bone primordia  
677 and the epithelium lining and smooth muscles of the GI tract [50-57]. Accordingly, CEP164  
678 is not present in the hepatocytes, which do not contain primary cilium [58].

679

680 CEP164 is expressed in tissues involved in the CEP164 NPHP-RC phenotype, but is also  
681 expressed in tissues not associated with this phenotype. It could be that CEP164 has cell-  
682 specific functions, not all tissues may rely on the primary cilium for development or have  
683 other pathways that can compensate for the abnormal functioning or loss of CEP164.  
684 Remarkably, human CEP164 expression patterns demonstrated here correlate with previously  
685 reported expression patterns of the JBTS genes *AHII* and *CEP290* [59]. This could indicate a  
686 universal mechanism that underlies NPHP-RC.

687

688 In summary, CEP164 demonstrates widespread yet defined expression throughout human and  
689 murine development, which is predominantly maintained into adult life. Human and murine  
690 data largely correlate and CEP164 function is likely to be conserved between the two species.  
691 CEP164 is expressed in tissues affected in CEP164-NPHP-RC patients, however clinical  
692 heterogeneity, commonly seen in ciliopathies, needs to be further investigated.

693

694

695 **Acknowledgements**

696 L.A.D is funded by the Medical Research Council Discovery Medicine North Doctoral  
697 Training Partnership, and The Northern Counties Kidney Research Fund.

698

699

700

701

702

703

## References

1. Chaki, M., et al., *Exome capture reveals ZNF423 and CEP164 mutations, linking renal ciliopathies to DNA damage response signaling*. Cell, 2012. **150**(3): p. 533-48.
2. Graser, S., et al., *Cep164, a novel centriole appendage protein required for primary cilium formation*. J Cell Biol, 2007. **179**(2): p. 321-30.
3. Utsch, B., et al., *Identification of the first AH11 gene mutations in nephronophthisis-associated Joubert syndrome*. Pediatr Nephrol, 2006. **21**(1): p. 32-5.
4. Delous, M., et al., *The ciliary gene RPGRIP1L is mutated in cerebello-oculo-renal syndrome (Joubert syndrome type B) and Meckel syndrome*. Nat Genet, 2007. **39**(7): p. 875-81.
5. Maria, B.L., et al., *"Joubert syndrome" revisited: key ocular motor signs with magnetic resonance imaging correlation*. J Child Neurol, 1997. **12**(7): p. 423-30.
6. Lambert, S.R., et al., *Joubert syndrome*. Arch Ophthalmol, 1989. **107**(5): p. 709-13.
7. Sturm, V., et al., *Ophthalmological findings in Joubert syndrome*. Eye (Lond), 2010. **24**(2): p. 222-5.
8. van Dorp, D.B., et al., *Joubert syndrome: a clinical and pathological description of an affected male and a female fetus from the same sibship*. Am J Med Genet, 1991. **40**(1): p. 100-4.
9. Maria, M., et al., *Genetic and clinical characterization of Pakistani families with Bardet-Biedl syndrome extends the genetic and phenotypic spectrum*. Sci Rep, 2016. **6**: p. 34764.
10. Parisi, M.A., et al., *Joubert syndrome (and related disorders) (OMIM 213300)*. Eur J Hum Genet, 2007. **15**(5): p. 511-21.
11. Brancati, F., B. Dallapiccola, and E.M. Valente, *Joubert Syndrome and related disorders*. Orphanet J Rare Dis, 2010. **5**: p. 20.
12. Srivastava, S., et al., *Many Genes-One Disease? Genetics of Nephronophthisis (NPHP) and NPHP-Associated Disorders*. Front Pediatr, 2017. **5**: p. 287.
13. Kikuno, R., et al., *Prediction of the coding sequences of unidentified human genes. XIV. The complete sequences of 100 new cDNA clones from brain which code for large proteins in vitro*. DNA Res, 1999. **6**(3): p. 197-205.
14. Sivasubramaniam, S., et al., *Cep164 is a mediator protein required for the maintenance of genomic stability through modulation of MDC1, RPA, and CHK1*. Genes Dev, 2008. **22**(5): p. 587-600.
15. Schmidt, K.N., et al., *Cep164 mediates vesicular docking to the mother centriole during early steps of ciliogenesis*. J Cell Biol, 2012. **199**(7): p. 1083-101.
16. Andersen, J.S., et al., *Proteomic characterization of the human centrosome by protein correlation profiling*. Nature, 2003. **426**(6966): p. 570-4.
17. Daly, O.M., et al., *CEP164-null cells generated by genome editing show a ciliation defect with intact DNA repair capacity*. J Cell Sci, 2016. **129**(9): p. 1769-74.
18. Sonnen, K.F., et al., *3D-structured illumination microscopy provides novel insight into architecture of human centrosomes*. Biol Open, 2012. **1**(10): p. 965-76.
19. Lau, L., et al., *STED microscopy with optimized labeling density reveals 9-fold arrangement of a centriole protein*. Biophys J, 2012. **102**(12): p. 2926-35.
20. Shi, X., et al., *Super-resolution microscopy reveals that disruption of ciliary transition-zone architecture causes Joubert syndrome*. Nat Cell Biol, 2017. **19**(10): p. 1178-1188.
21. Sillibourne, J.E., et al., *Assessing the localization of centrosomal proteins by PALM/STORM nanoscopy*. Cytoskeleton (Hoboken), 2011. **68**(11): p. 619-27.
22. Yang, *Super-resolution architecture of mammalian centriole distal appendages reveals distinct blade and matrix functional components*. Nature Communications, 2018(9).
23. Tanos, B.E., et al., *Centriole distal appendages promote membrane docking, leading to cilia initiation*. Genes Dev, 2013. **27**(2): p. 163-8.
24. Siller, S.S., et al., *Conditional knockout mice for the distal appendage protein CEP164 reveal its essential roles in airway multiciliated cell differentiation*. PLoS Genet, 2017. **13**(12): p. e1007128.



25. Slaats, G.G., et al., *Nephronophthisis-associated CEP164 regulates cell cycle progression, apoptosis and epithelial-to-mesenchymal transition*. PLoS Genet, 2014. **10**(10): p. e1004594.
26. Kong, D., et al., *Centriole maturation requires regulated Plkl activity during two consecutive cell cycles*. J Cell Biol, 2014. **206**(7): p. 855-65.
27. Slaats, G.G., et al., *DNA replication stress underlies renal phenotypes in CEP290-associated Joubert syndrome*. Journal of Clinical Investigation, 2015. **125**(9): p. 3657-3666.
28. Humbert, M.C., et al., *ARL13B, PDE6D, and CEP164 form a functional network for INPP5E ciliary targeting*. Proc Natl Acad Sci U S A, 2012. **109**(48): p. 19691-6.
29. Cajanek, L. and E.A. Nigg, *Cep164 triggers ciliogenesis by recruiting Tau tubulin kinase 2 to the mother centriole*. Proc Natl Acad Sci U S A, 2014. **111**(28): p. E2841-50.
30. Burke, M.C., et al., *Chibby promotes ciliary vesicle formation and basal body docking during airway cell differentiation*. J Cell Biol, 2014. **207**(1): p. 123-37.
31. Goetz, S.C. and K.V. Anderson, *The primary cilium: a signalling centre during vertebrate development*. Nat Rev Genet, 2010. **11**(5): p. 331-44.
32. Oda, T., et al., *Binding to Cep164, but not EBI, is essential for centriolar localization of TTBK2 and its function in ciliogenesis*. Genes Cells, 2014. **19**(12): p. 927-40.
33. Pan, Y.R. and E.Y. Lee, *UV-dependent interaction between Cep164 and XPA mediates localization of Cep164 at sites of DNA damage and UV sensitivity*. Cell Cycle, 2009. **8**(4): p. 655-64.
34. Ensembl. *Cep164 Murine*. 2018; Available from: [http://www.ensembl.org/Mus\\_musculus/Gene/Summary?db=coreg=ENSMUSG00000043987;r=9:45766946-45828691](http://www.ensembl.org/Mus_musculus/Gene/Summary?db=coreg=ENSMUSG00000043987;r=9:45766946-45828691).
35. UCSC. *Cep164*. 2018; Available from: [https://genome-euro.ucsc.edu/cgi-bin/hgTracks?db=mm10&lastVirtModeType=default&lastVirtModeExtraState=&virtModeType=default&virtMode=0&nonVirtPosition=&position=chr9%3A45766946%2D45828638&hgid=228133814\\_F2CW3i2YqX1AWfv9drbXnDCIGq0v](https://genome-euro.ucsc.edu/cgi-bin/hgTracks?db=mm10&lastVirtModeType=default&lastVirtModeExtraState=&virtModeType=default&virtMode=0&nonVirtPosition=&position=chr9%3A45766946%2D45828638&hgid=228133814_F2CW3i2YqX1AWfv9drbXnDCIGq0v).
36. IMPC. *Cep164*. 2018; Available from: <http://www.mousephenotype.org/data/genes/MGI:2384878>.
37. Saraga-Babic, M., et al., *Ciliogenesis in normal human kidney development and post-natal life*. Pediatr Nephrol, 2012. **27**(1): p. 55-63.
38. Ichimura, K., H. Kurihara, and T. Sakai, *Primary cilia disappear in rat podocytes during glomerular development*. Cell Tissue Res, 2010. **341**(1): p. 197-209.
39. Atlas, T.H.P. *CEP164*. 2018; Available from: <http://www.proteinatlas.org/search/cep164>.
40. Fuchs, J.L. and H.D. Schwark, *Neuronal primary cilia: a review*. Cell Biol Int, 2004. **28**(2): p. 111-8.
41. Bibb, L.C., et al., *Temporal and spatial expression patterns of the CRX transcription factor and its downstream targets. Critical differences during human and mouse eye development*. Hum Mol Genet, 2001. **10**(15): p. 1571-9.
42. Liu, Q., et al., *The proteome of the mouse photoreceptor sensory cilium complex*. Mol Cell Proteomics, 2007. **6**(8): p. 1299-317.
43. Blackshaw, S., et al., *Genomic analysis of mouse retinal development*. PLoS Biol, 2004. **2**(9): p. E247.
44. Westlake, C.J., et al., *Primary cilia membrane assembly is initiated by Rab11 and transport protein particle II (TRAPP2) complex-dependent trafficking of Rabin8 to the centrosome*. Proc Natl Acad Sci U S A, 2011. **108**(7): p. 2759-64.
45. Guemez-Gamboa, A., N.G. Coufal, and J.G. Gleeson, *Primary cilia in the developing and mature brain*. Neuron, 2014. **82**(3): p. 511-21.
46. Miller, J.A.H., S. Geshwind. D.H., *Divergence of human and mouse brain transcriptome highlights Alzheimer disease pathways*. PNAS, 2009. **107**(28): p. 12698-12703.
47. Lynn, R.B., et al., *Autoradiographic localization of leptin binding in the choroid plexus of ob/ob and db/db mice*. Biochem Biophys Res Commun, 1996. **219**(3): p. 884-9.
48. Afzelius, B.A., *Cilia-related diseases*. J Pathol, 2004. **204**(4): p. 470-7.
49. Fishman, E.L., et al., *A novel atypical sperm centriole is functional during human fertilization*. Nat Commun, 2018. **9**(1): p. 2210.



50. Clement, C.A., et al., *The primary cilium coordinates early cardiogenesis and hedgehog signaling in cardiomyocyte differentiation*. J Cell Sci, 2009. **122**(Pt 17): p. 3070-82.
51. Koefoed, K., et al., *Cilia and coordination of signaling networks during heart development*. Organogenesis, 2014. **10**(1): p. 108-25.
52. Saqui-Salces, M., et al., *A high-fat diet regulates gastrin and acid secretion through primary cilia*. FASEB J, 2012. **26**(8): p. 3127-39.
53. McGlashan, S.R., C.G. Jensen, and C.A. Poole, *Localization of extracellular matrix receptors on the chondrocyte primary cilium*. J Histochem Cytochem, 2006. **54**(9): p. 1005-14.
54. Delaine-Smith, R.M., A. Sittichokechaiwut, and G.C. Reilly, *Primary cilia respond to fluid shear stress and mediate flow-induced calcium deposition in osteoblasts*. FASEB J, 2014. **28**(1): p. 430-9.
55. Temiyasathit, S. and C.R. Jacobs, *Osteocyte primary cilium and its role in bone mechanotransduction*. Ann N Y Acad Sci, 2010. **1192**: p. 422-8.
56. Best, J., et al., *Role of liver progenitors in liver regeneration*. Hepatobiliary Surg Nutr, 2015. **4**(1): p. 48-58.
57. Masyuk, A.I., T.V. Masyuk, and N.F. LaRusso, *Cholangiocyte primary cilia in liver health and disease*. Dev Dyn, 2008. **237**(8): p. 2007-12.
58. Clotman, F., et al., *Lack of cilia and differentiation defects in the liver of human fetuses with the Meckel syndrome*. Liver Int, 2008. **28**(3): p. 377-84.
59. Hynes, A.M., et al., *Murine Joubert syndrome reveals Hedgehog signaling defects as a potential therapeutic target for nephronophthisis*. Proceedings of the National Academy of Sciences of the United States of America, 2014. **111**(27): p. 9893-9898.
60. Chauvet, V., et al., *Expression of PKD1 and PKD2 transcripts and proteins in human embryo and during normal kidney development*. Am J Pathol, 2002. **160**(3): p. 973-83.
61. Seely, J.C., *A brief review of kidney development, maturation, developmental abnormalities, and drug toxicity: juvenile animal relevancy*. J Toxicol Pathol, 2017. **30**(2): p. 125-133.
62. Faa, G., et al., *Morphogenesis and molecular mechanisms involved in human kidney development*. J Cell Physiol, 2012. **227**(3): p. 1257-68.
63. Lindstrom, N.O., et al., *Conserved and Divergent Features of Human and Mouse Kidney Organogenesis*. J Am Soc Nephrol, 2018. **29**(3): p. 785-805.
64. Little, M.H. and A.P. McMahon, *Mammalian kidney development: principles, progress, and projections*. Cold Spring Harb Perspect Biol, 2012. **4**(5).
65. Cheng, Y.Z., et al., *Investigating Embryonic Expression Patterns and Evolution of AH11 and CEP290 Genes, Implicated in Joubert Syndrome*. Plos One, 2012. **7**(9).
66. Davidson, A.J., *Mouse kidney development*, in StemBook. 2008: Cambridge (MA).
67. Wu, B., D. Sahoo, and J.D. Brooks, *Comprehensive gene expression changes associated with mouse postnatal kidney development*. J Urol, 2013. **189**(6): p. 2385-90.
68. Al-Jaberi, N., et al., *The early fetal development of human neocortical GABAergic interneurons*. Cereb Cortex, 2015. **25**(3): p. 631-45.
69. Hill, M.A., *Embryology Vision - Retina Development*. . 2019.
70. Spira, A.W. and M.J. Hollenberg, *Human retinal development: ultrastructure of the inner retinal layers*. Dev Biol, 1973. **31**(1): p. 1-21.
71. Hollenberg, M.J. and A.W. Spira, *Human retinal development: ultrastructure of the outer retina*. Am J Anat, 1973. **137**(4): p. 357-85.
72. Zhang, X., J.M. Serb, and M.H. Greenlee, *Mouse retinal development: a dark horse model for systems biology research*. Bioinform Biol Insights, 2011. **5**: p. 99-113.
73. Zhang, S.S., et al., *A biphasic pattern of gene expression during mouse retina development*. BMC Dev Biol, 2006. **6**: p. 48.
74. Cho, K.H., et al., *Early fetal development of the human cerebellum*. Surg Radiol Anat, 2011. **33**(6): p. 523-30.
75. White, J.J. and R.V. Sillitoe, *Development of the cerebellum: from gene expression patterns to circuit maps*. Wiley Interdiscip Rev Dev Biol, 2013. **2**(1): p. 149-64.
76. Abraham, H., et al., *Cell formation in the cortical layers of the developing human cerebellum*. Int J Dev Neurosci, 2001. **19**(1): p. 53-62.

77. Sudarov, A. and A.L. Joyner, *Cerebellum morphogenesis: the foliation pattern is orchestrated by multi-cellular anchoring centers*. Neural Dev, 2007. **2**: p. 26.
78. Martinez, S., et al., *Cellular and molecular basis of cerebellar development*. Front Neuroanat, 2013. **7**: p. 18.

889

890

891

## 892 **Supporting Information Captions**

893

894

895 **S1 Table. Working dilutions of primary antibodies used for immunohistochemistry of**  
896 **human tissues**

897

898 **S2 Table. Comparison of human and murine kidney developmental timeline**

899

900 **S3 Table. Comparison of human and murine retina developmental timeline**

901

902 **S4 Table. Comparison of human and murine cerebellar development timeline**

903

904

905

## **S1 Figure. Conservation and protein domains of human CEP164**

(A) Predicted human CEP164 protein domains; tryptophan-tryptophan (WW) domain conserved with two Tryptophan (W) residues, Lysine-rich repeat (LR) and predicted coiled-coil (CC) domains. Values marked are amino acid number. (B) Sequence alignment of human CEP164 and its orthologs in *M.musculus*, *D.melanogaster*, *C. reinhardtii* and *D rerio*. (C) Unrooted phylogenetic tree of CEP164 orthologs. (D) Taxonomic profiles of CEP164 derived from EggNOG4.5.1 showing absence of CEP164 in nematoda taxa.

## **S2 Figure. Diagram of the 129/OlaHsd- *Cep164*<sup>tm1a</sup> allele**

Upon pre-mRNA splicing of *Cep164*<sup>tm1a</sup>, exon 3 splices into the splice acceptor (SA) of the *LacZ* cassette, causing a frameshift and subsequent formation of a premature termination codon, this forms the tm1b allele. The *LacZ* has an internal ribosomal entry site (IRES), and thus the *LacZ* fusion gene acts as a reporter gene for *Cep164*.

Internal ribosomal entry site (IRES), splice acceptor (SA), polyadenylation site (pA).

## **S3 Figure. CEP164 wholemount expression throughout murine embryonic development and corresponding WT littermate controls**

At E9.5 (A), *Cep164* widespread expression is seen, including the branchial arches, developing forebrain, midbrain and hindbrain (A.I). There is also *Cep164* expression seen in the developing neural tube, including the neuroepithelium surrounding the anterior neuropore (A.II). There is *Cep164* expression seen in the developing heart including the central ventricle, bulbous cordis and outflow tract (A.III), as well as the developing limb buds (A.IV). This *Cep164* expression pattern is maintained at E10.5 (B), *Cep164* expression is seen in the optic cup and olfactory pit (B). At E12.5 *Cep164* expression is widespread but is

defined in the spinal cord, vertebrae, cerebral cortex, midbrain, hindbrain, pons and medulla oblongata, otocyst and heart (C.I.II.III). *Cep164* expression is seen in the retina (C.IV) and at the tips of the developing digits, where the apical ectodermal ridge is present (C.V.VI.VII.VIII). WT littermates do not show endogenous beta galactosidase expression at E9.5 (D.I), E10.5 (D.II), and E12.5 (F).

Anterior nucleopore (ANP), apical ectodermal ridge (AER), branchial arch (BA), bulbous cordis (BC), cerebral cortex (CC), common atria (CA), common ventricle (CV), forebrain (FB), forelimb bud (FL), heart (Ht), hindbrain (HB), hindlimb bud (HL), medulla oblongata (MO), midbrain (MB), neural tube (NT), olfactory pit (OF), optic cup (OC), organ primordia (Pri), otocyst (OT), outflow tract (OFT), pons (PO), somites (SM), spinal cord (SC), vertebral column (VC).

#### **S4 Figure. Human CEP164 expression controls**

No primary antibody controls in the 8 PCW Kidney (A) and 18 PCW (B) kidney. Renal vesicles, comma-shaped vesicles, S-Shaped body, uterine bud and cap mesenchyme (A.I.II.III, B.I.II.III). Renal tubule and the renal corpuscle (A.IV.V.VII, B.IV.V.VI), Loop of Henle and collecting ducts (B.VII). Lung, including the bronchioles and alveoli (C.I.II.III), cardiomyocytes of the heart (C.I.IV.V), gastrointestinal tract (C.VI) and gonads (C.VII.VIII). Dorsal root ganglia (C.VIX) and bone primordia (C.VX), liver (C.IX). Developing brain (D.I, E.I) including the telencephalon (C.VI), metencephalon (C.V) and myelencephalon (C.VIII). Midline (D.II), and neuroepithelium surrounding the brain ventricles (C.VIII, D.III.IV). Choroid plexus ependymal cells (C.II.III.IV) and choroid plexus pia matter (C.III.IV). Molecular cell layer, Purkinje and ganglion cell layers of cerebellum (F.I.II). Ventricular

955 surface (F.III.IV), medulla oblongata (F.VI), and white matter (F.VII). Choroid plexus at 16  
956 PCW (F.V). PAX9 positive control antibody (E.V, F.IX).

957

958 Alveoli primordia (Av Pri), bone primordia (BP), bronchiole (Br), cap mesenchyme (CM),  
959 cardiomyocyte (CM), cerebellum (Ce), choroid plexus (CP), collecting duct (CD), cortical  
960 plate (CorP), diencephalon (Di), dorsal root ganglia (DRG), ependymal cells (Ep), ganglion  
961 cell layer (GCL), gastrointestinal tract (GI), germline epithelium (GE), gonad (Go),  
962 intermediate Zone (IL), heart (Ht), hepatocytes (Hep), fourth ventricle (FV), kidney (Ki),  
963 lateral ventricle (LV), lamina propria (LM), liver (Li), loop of henle (LH), lung (Lu),  
964 marginal Layer (MaL), medulla oblongata (MO), mesencephalon (Mes), metencephalon  
965 (Met), midline (Mi), molecular Cell Layer (MCL), muscularis externa (ME), muscularis  
966 mucosae (MM), myelencephalon (Mye), nasal epithelium (Na), pia (P), post conception weeks  
967 (PCW), purkinje cell layer (PCL), renal corpuscle (RC), renal tubules (RT), renal vesicle  
968 (RV), seminiferous cord (SC), s-shaped body (SSB), submucosae (SB), sub-ventricular layer  
969 (SVL), squamous epithelium mucosae (Mc-sq), telencephalon (Tel), uteric bud (UB),  
970 ventricular layer (VL), ventricular surface (VS), white matter (WM).

971

## 972 **S5 Figure. Littermate WT controls for murine *Cep164* expression**

973 (A) murine retina. (B-C) murine kidney (D) murine secondary tissues, (E-F) murine  
974 cerebellar tissues. Retina at P1.5 (A.I), P15.5 (A.II), and P29.5 (A.III). Renal vesicles  
975 (B.I.II.III), uteric bud (B.III), renal tubules (B.IV) and renal corpuscle (B.V.VI). Renal tissue  
976 at P30.5 has low endogenous beta galactosidase expression (C.I) in the renal tubules  
977 (C.III.IV), but not in the renal corpuscle (C.II). Developing brain (D.I), costal cartilage (D.II)  
978 and intercostal muscle (D.III). The P0.5 lung (E.I.II.III.IV), and alveoli (E.V), P30.5 murine  
979 lung trachea, bronchioles or alveoli (E.I.II.III.IV.V.VI). Murine heart, cardiomyocytes

980 (D.VI.VII, E.VI.VII), developing testes, spermatogonia, spermatocytes, spermatids and  
 981 smooth muscle cells in the seminiferous tubules (D.VIII.IX.X, E.VIII.IX.X).

982 Hepatocytes of the liver, hepatic portal vein (D.XI.XII.XIII, E.XI.XII.XIII). Murine brain  
 983 cerebral hemisphere (F.I.V, G.I.H.I), the midbrain (F.VI,G.VII,,H.V), the striatum (G.V,) and  
 984 thalamus (G.VI),H.VI).The choroid plexus shows some weak endogenous beta galactosidase  
 985 expression (F.IV). Ganglion cell layer, molecular cell layer, Purkinje cell layer and white  
 986 matter of the cerebellum (F.II.III.IV, G.II.III.IV, H.II.III).

987

988 Alveoli (Av), bronchiole (Br), cardiomyocyte (CM), cartilage (Ca), cerebellum (Ce), cerebral  
 989 hemisphere (Ch), cerebrum (Cr), choroid plexus (CP), connective tissue (CT), costal cartilage  
 990 (CC), epithelial (Ep), ganglion cell layer (GCL), heart (Ht), hepatocytes (Hep), inner nuclear  
 991 layer (INL), inner plexiform layer (IPL), intercostal muscle (IC), liver (Li), lung (Lu),  
 992 marginal layer (MaL), medulla oblongata (MO), midbrain (MB), molecular cell layer  
 993 (MCL), outer neuroblastic layer (ONBL), outer nuclear layer (ONL), outer plexiform layer  
 994 (OPL), photoreceptor segment layer (PS), pons (PO), postnatal day (P), purkinje cell layer  
 995 (PCL), renal corpuscle (RC), renal tubule (RT), renal vesicle (RV), respiratory bronchiole  
 996 (R), retinal pigment epithelium (RPE), seminiferous tubule (ST), smooth muscle (SM),  
 997 spermatids (Sp), spermatocytes (SC), spermatogonia (Spg), striatum (St), terminal bronchi  
 998 (TB), thalamus (Th), trachea (Tr), uteric bud (UB), white matter (WM).

999

1000



## Figure



## A Human

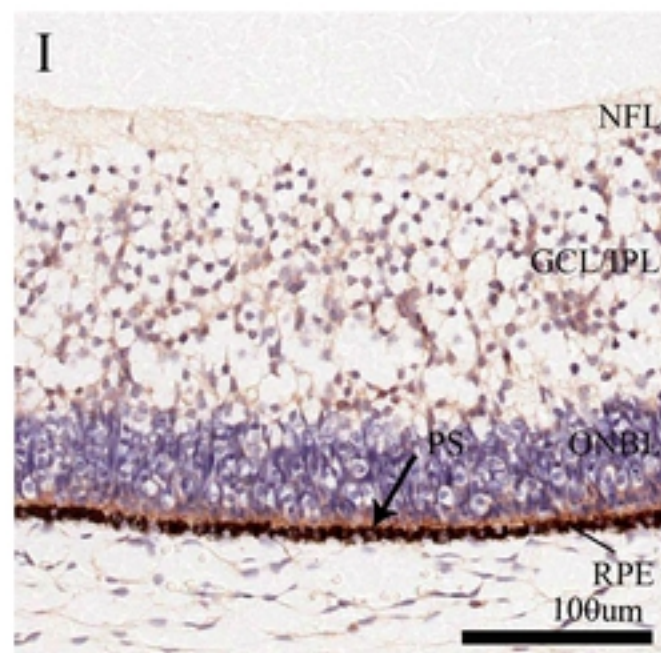

11 PCW

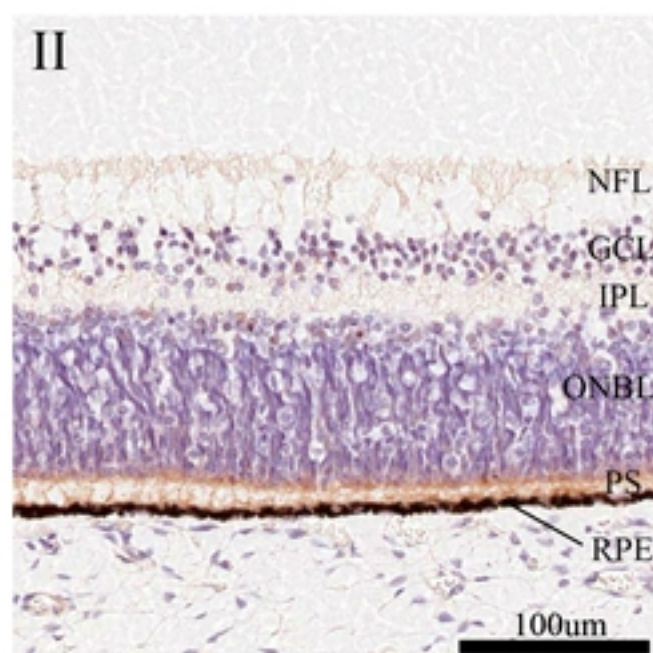

14 PCW

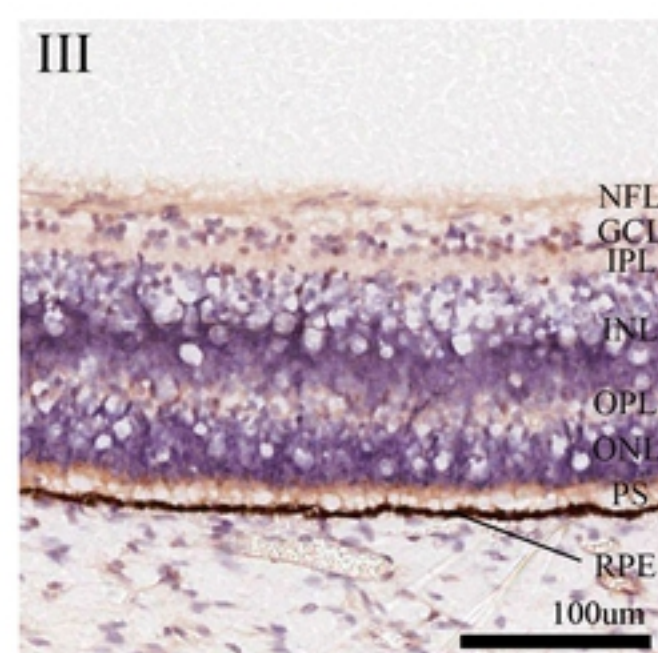

19 PCW

## B Mouse

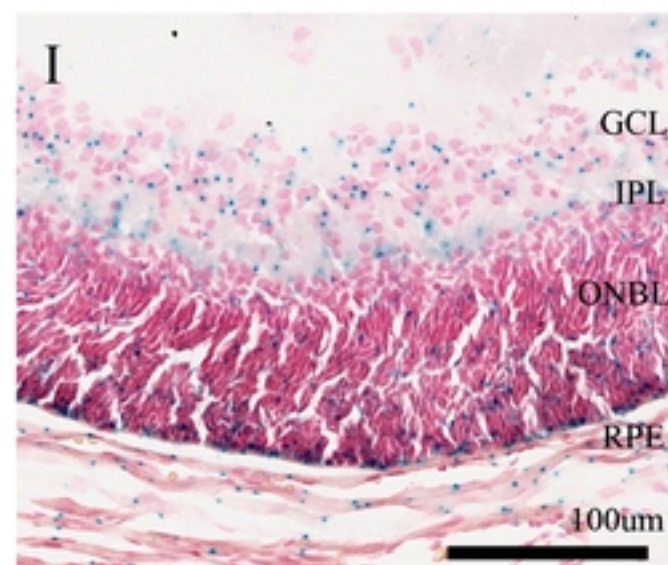

P1.5

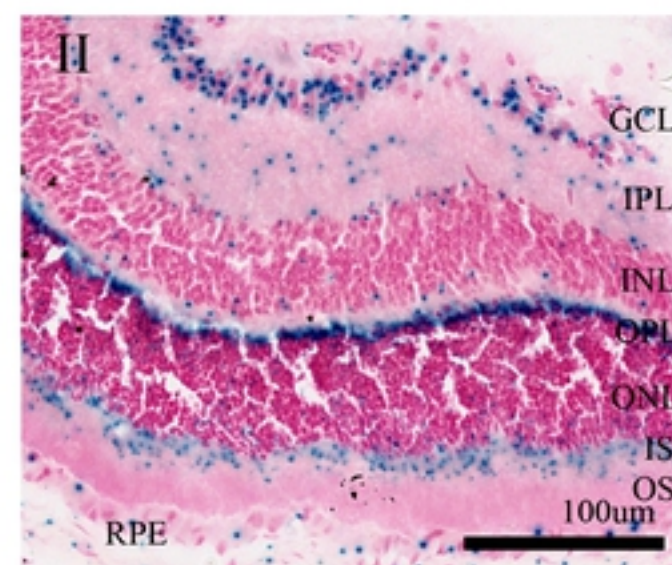

P15.5

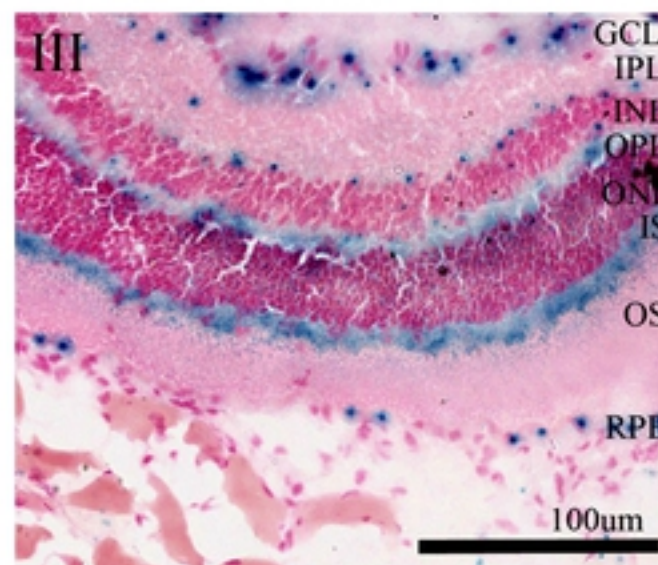

P29.5



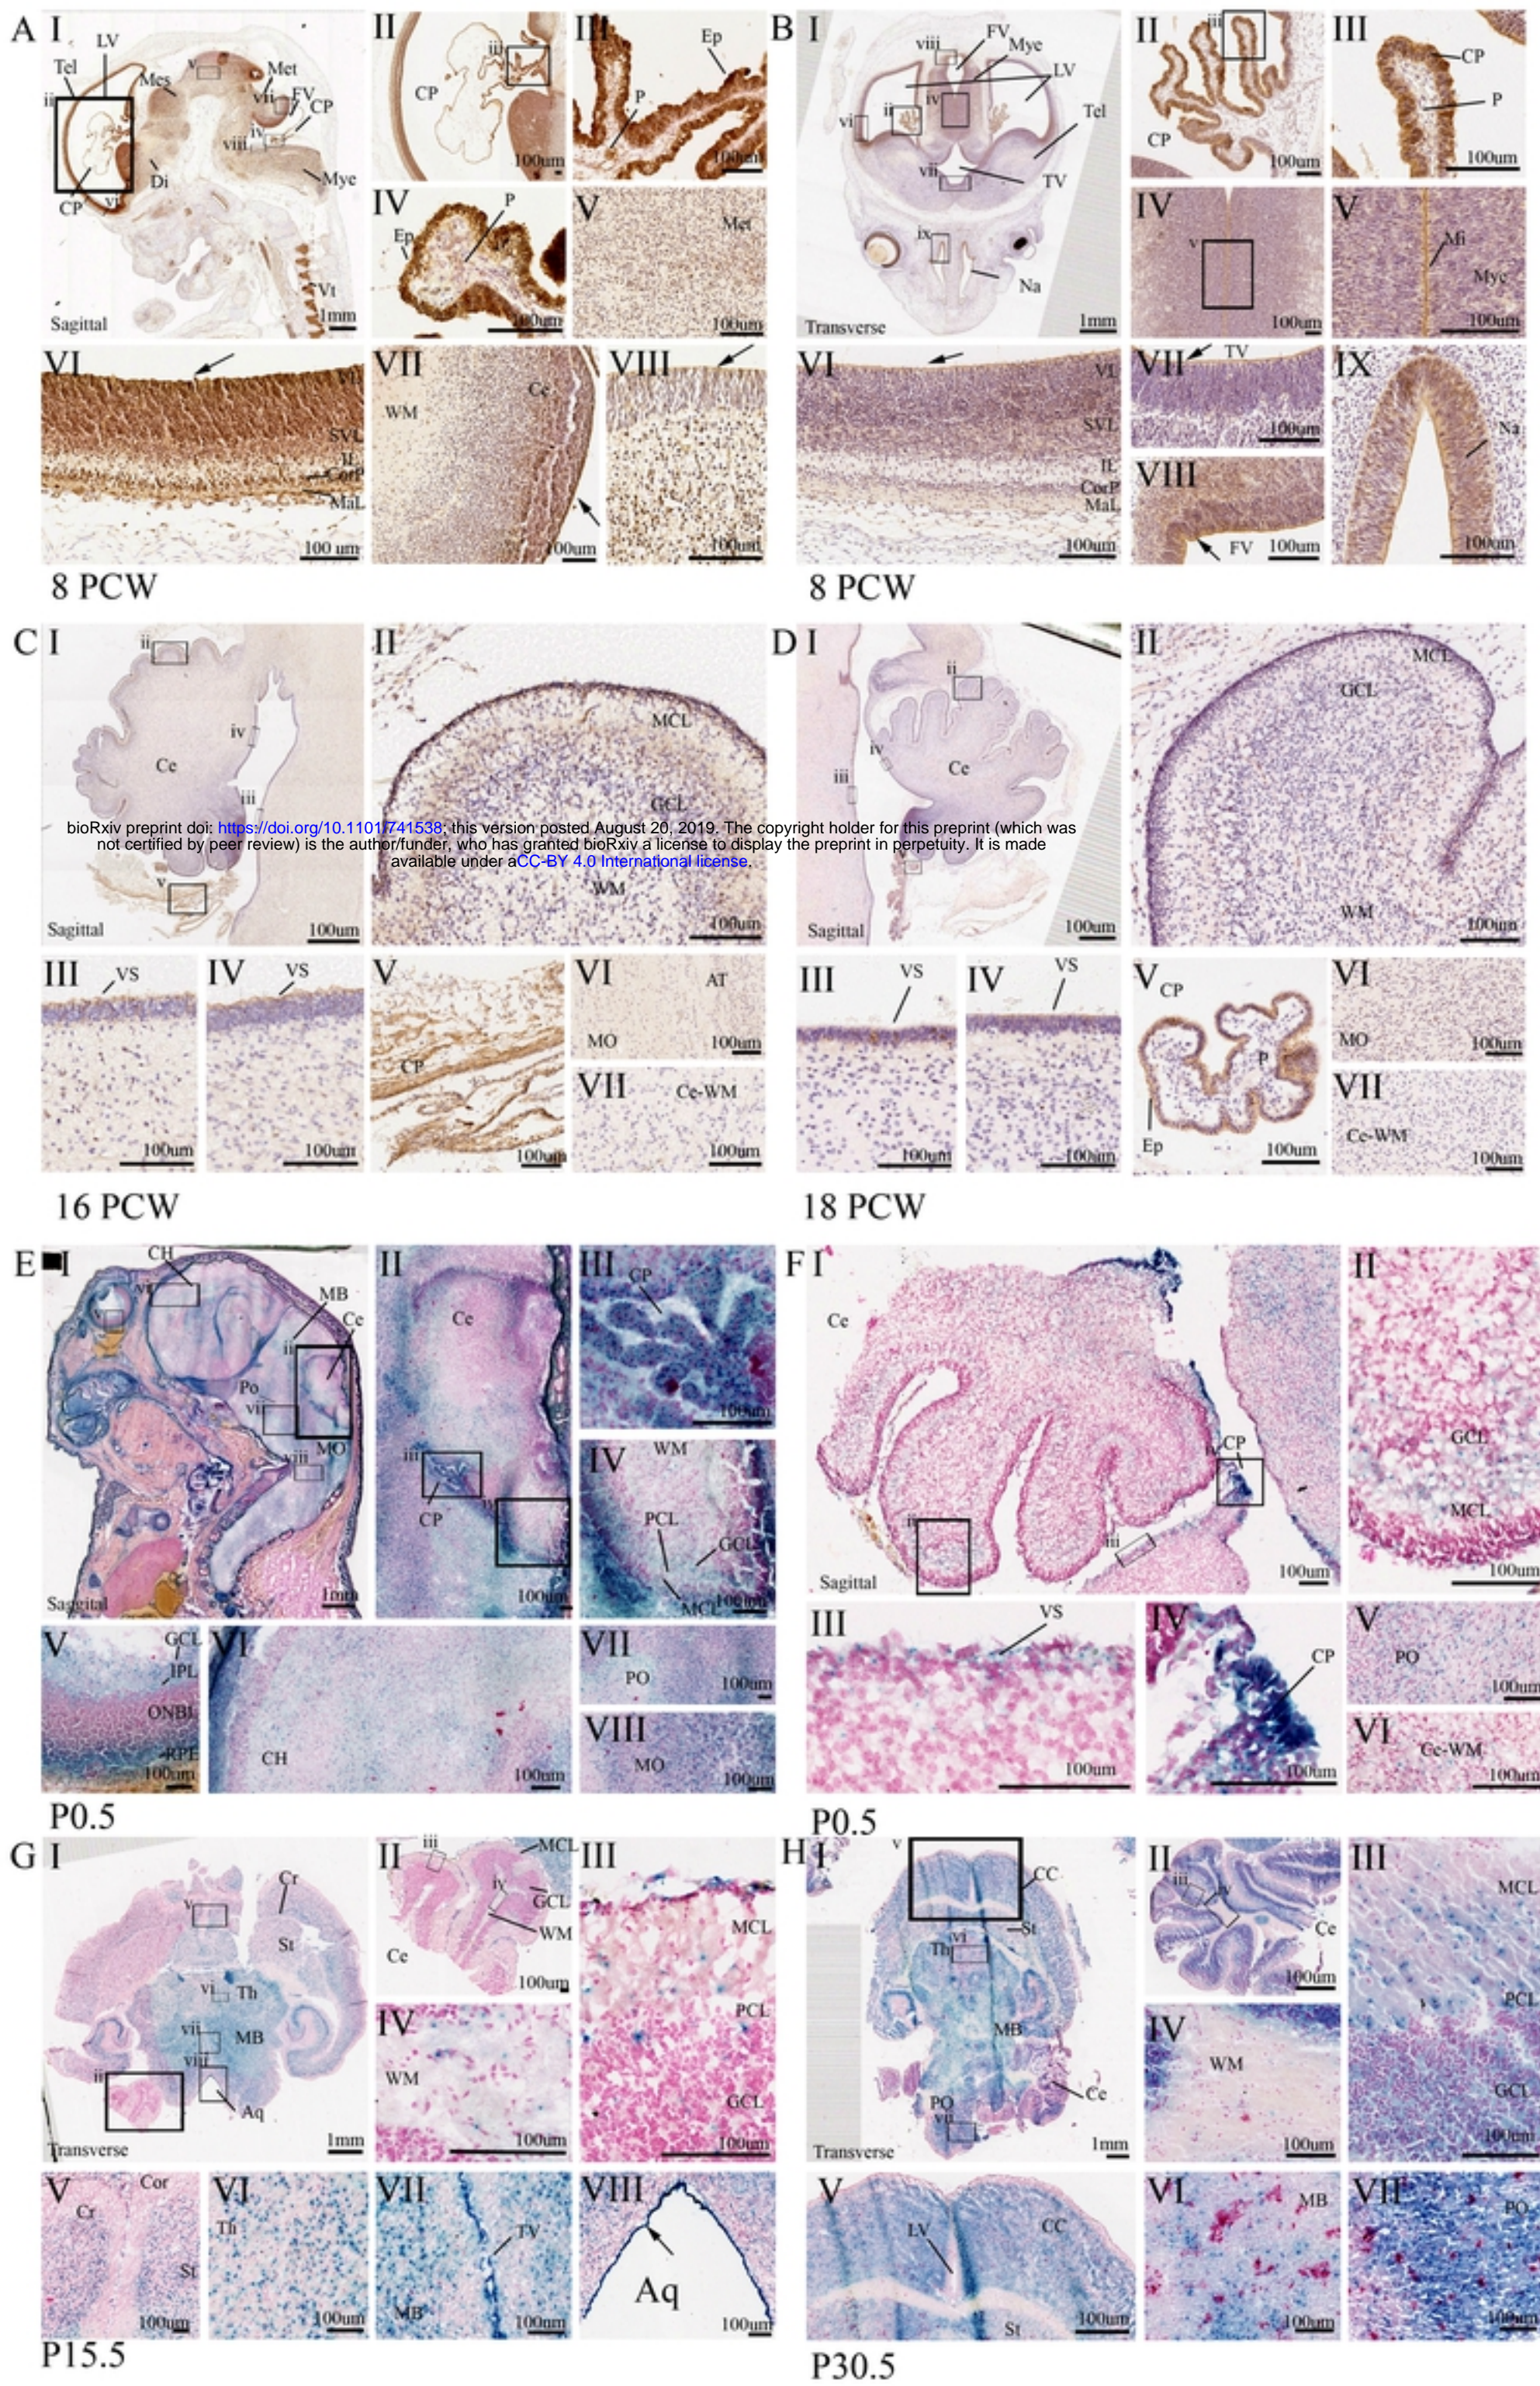

Figure



# Human

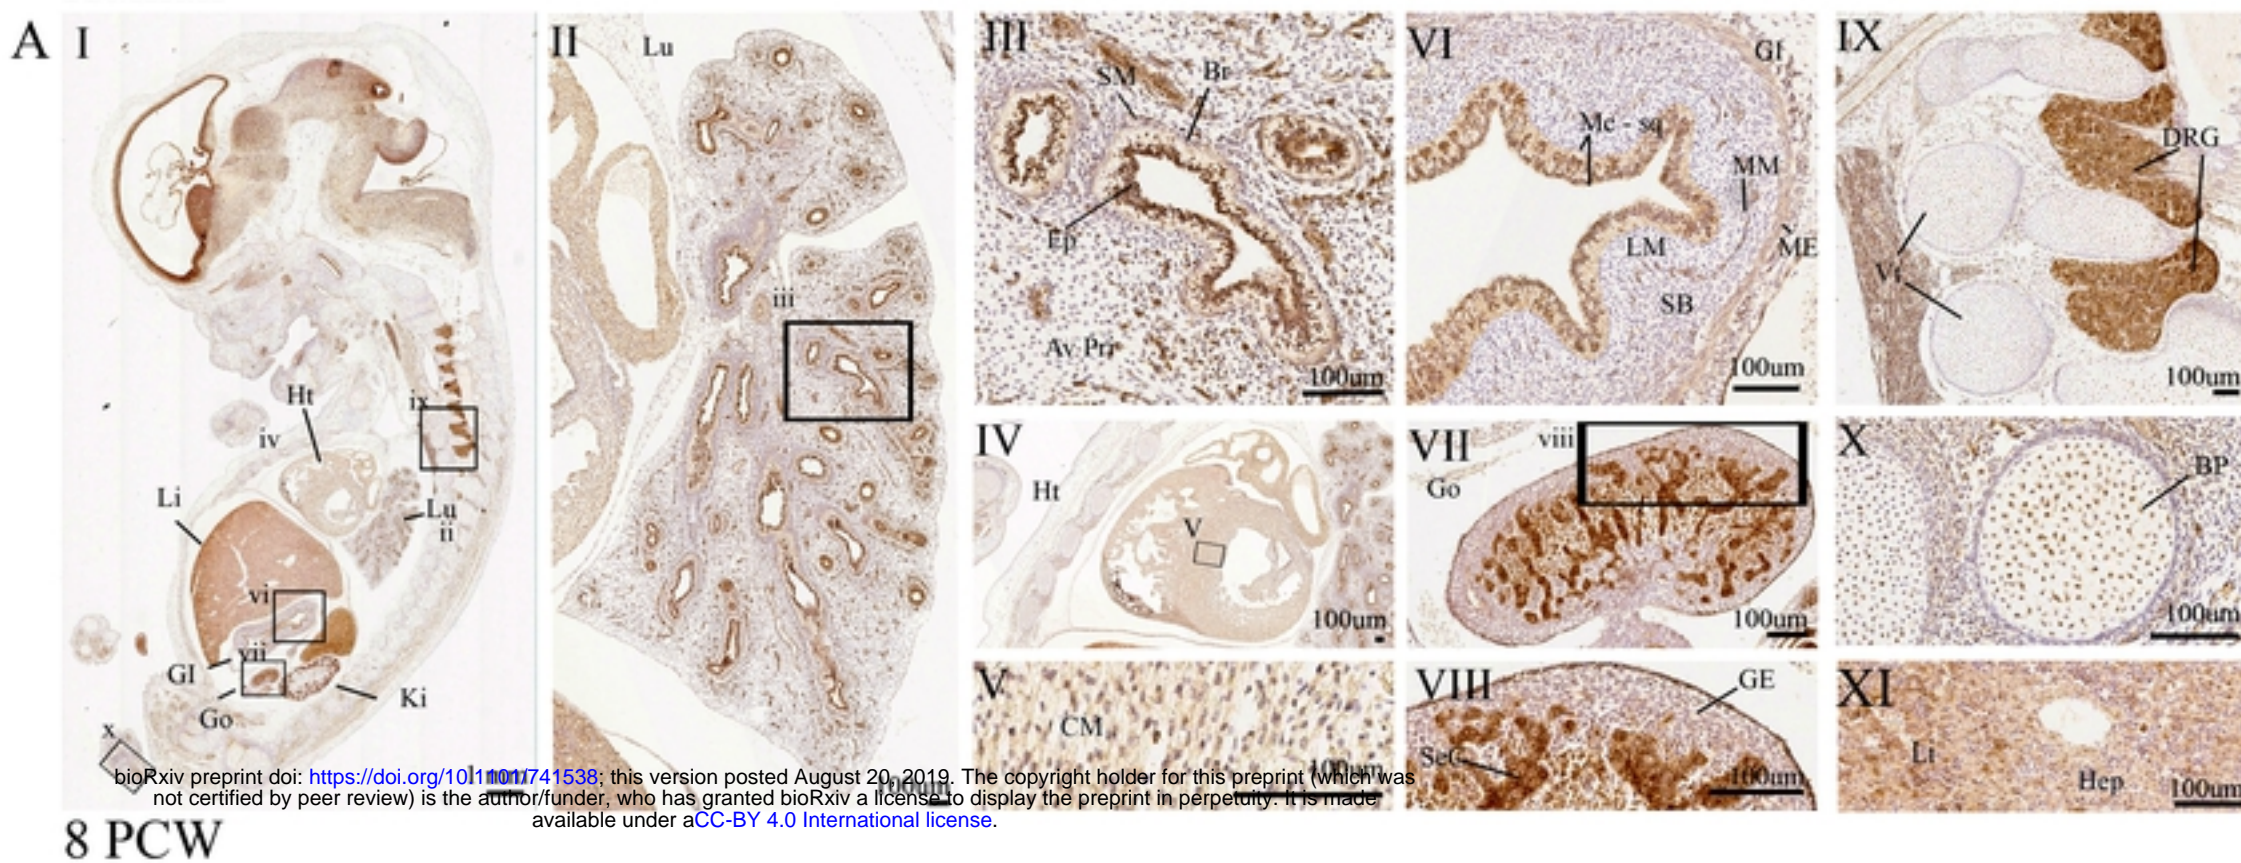

# Mouse

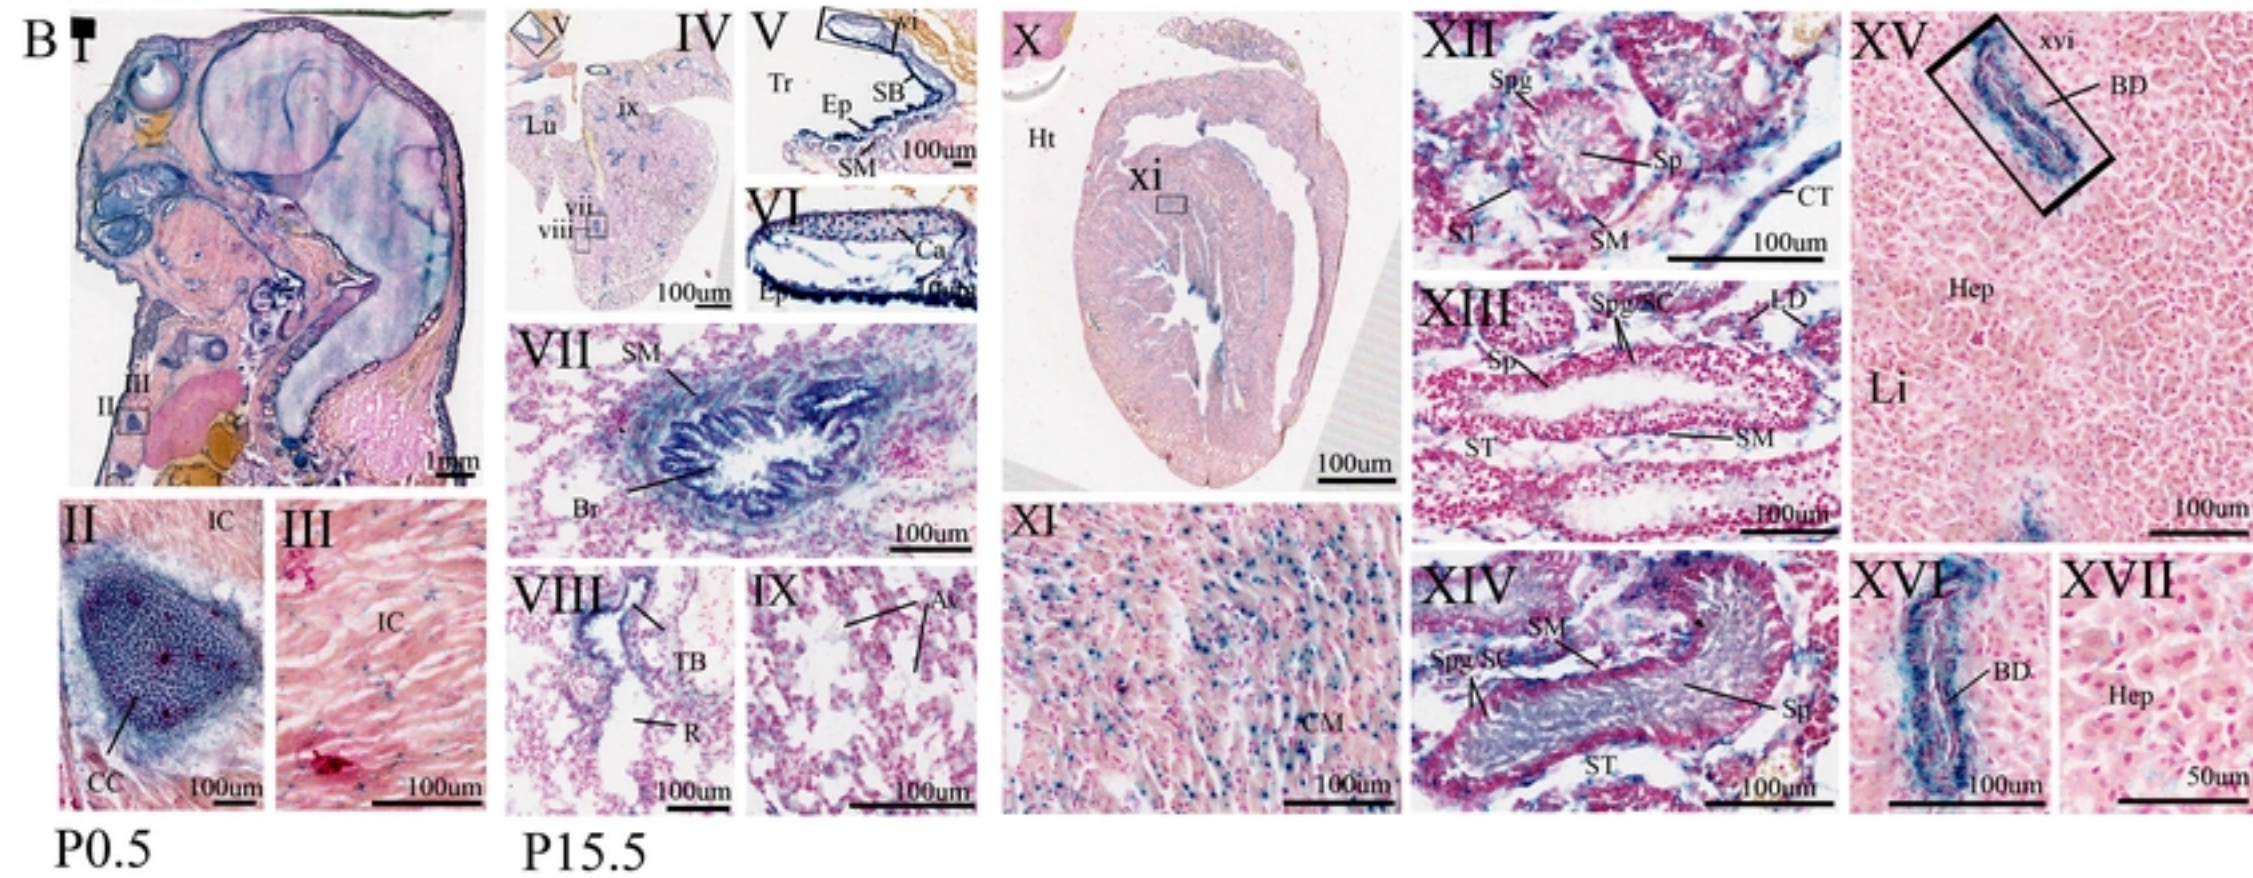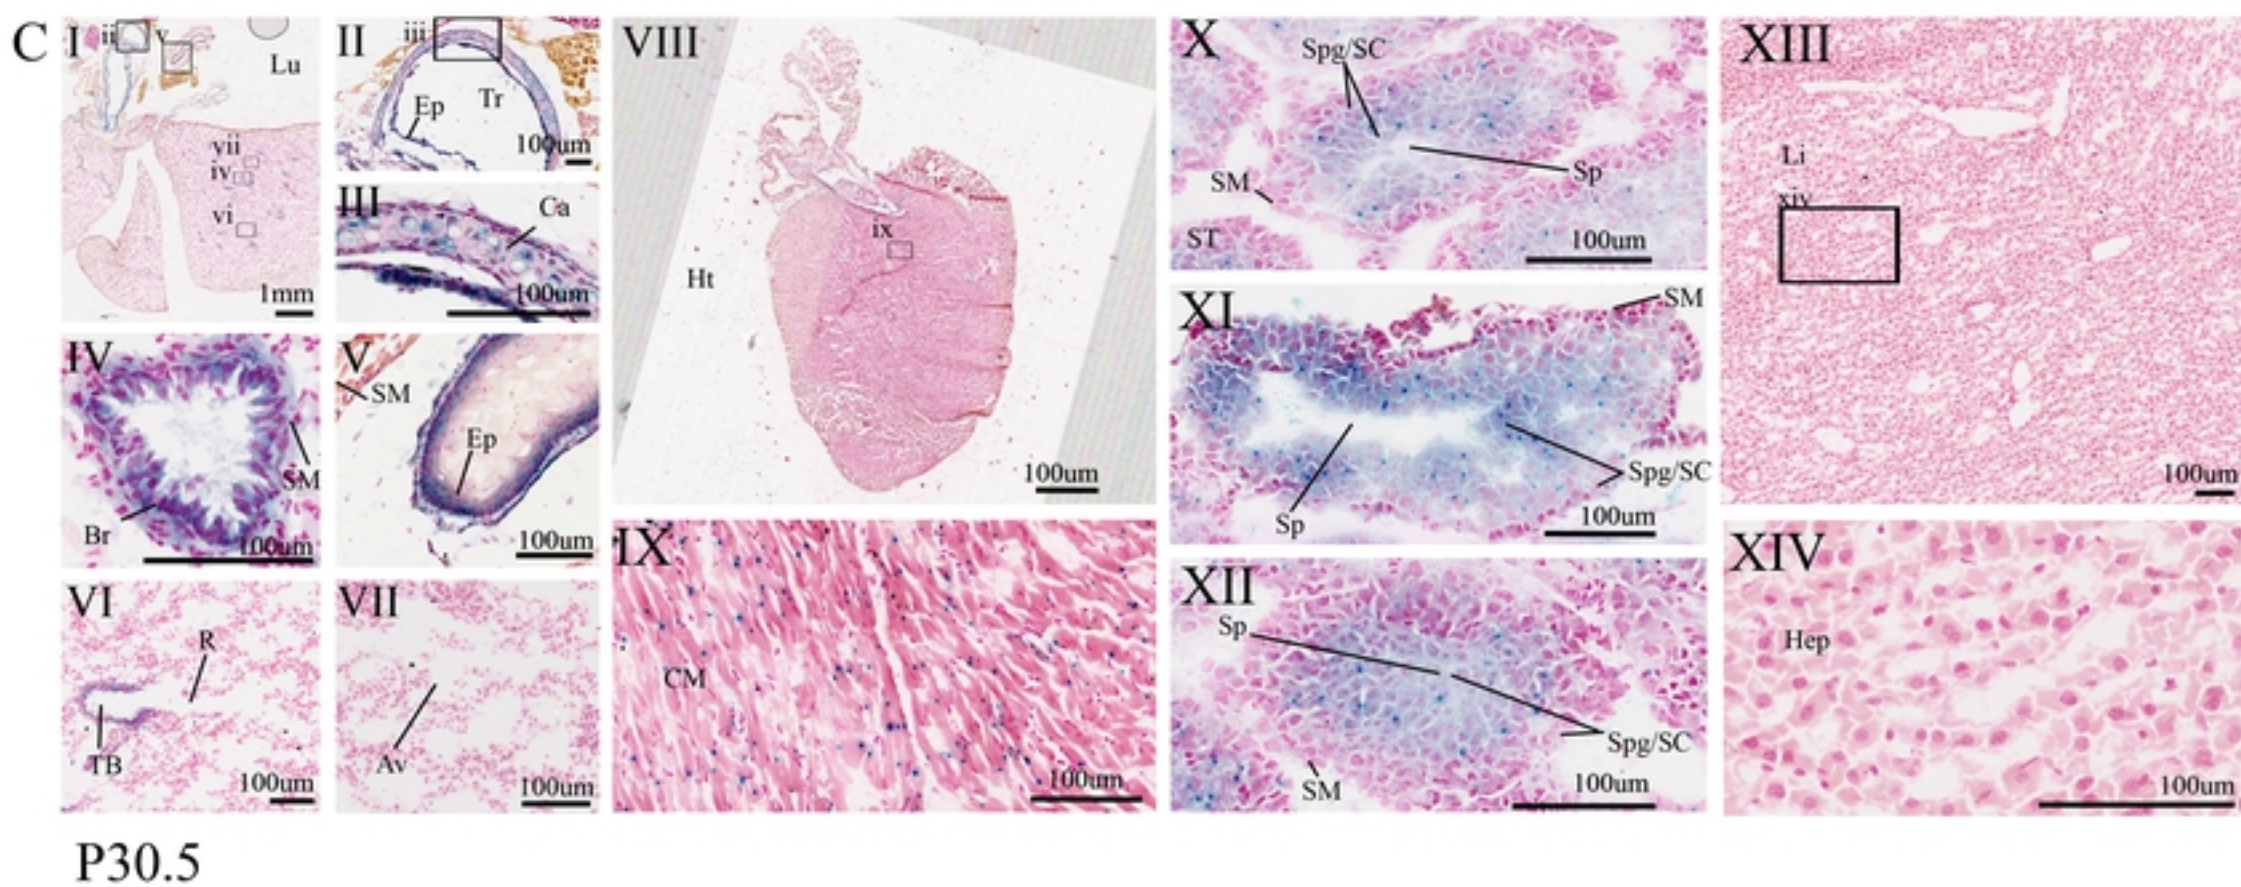

Source: https://www.biorxiv.org/content/10.1101/741538v1.full.pdf
